# Supplementary material for: Metabolic synergy and complementarity in the Ips typographus holobiont
Source: Research Square preprint supplement (doi:10.21203/rs.3.rs-5950784/v1), 2025-02-05
Supplement: Supplementary file 1 [file 7bfb196ba392b96164c1b040.xlsx]

## Sheet: S1
Supplementary Table 1. Functions involved in cell wall polysaccharide degradation. The values indicate the total count of samples in which each function is active, categorized by taxonomic group (beetle, Bacteria and Ascomycota)
Name	Beetle	Bacteria	Ascomycota
K01183	18	14	15	chitinase [EC:3.2.1.14]
K01207	0	18	7	beta-N-acetylhexosaminidase [EC:3.2.1.52]
K12373	18	15	11	hexosaminidase [EC:3.2.1.52]
K14459	18	0	0	hexosaminidase [EC:3.2.1.52]
K20730	18	0	0	beta-hexosaminidase Fdl [EC:3.2.1.52]
K00884	18	14	0	N-acetylglucosamine kinase [EC:2.7.1.59]
K01443	18	16	11	N-acetylglucosamine-6-phosphate deacetylase [EC:3.5.1.25]
K02564	18	17	8	glucosamine-6-phosphate deaminase [EC:3.5.99.6]
K01199	0	0	17	glucan endo-1,3-beta-D-glucosidase [EC:3.2.1.39]
K01210	0	0	17	glucan 1,3-beta-glucosidase [EC:3.2.1.58]
K01218	0	4	0	mannan endo-1,4-beta-mannosidase [EC:3.2.1.78]
K19355	0	0	1	mannan endo-1,4-beta-mannosidase [EC:3.2.1.78]
K02793	0	6	0	PTS system, mannose-specific IIA component [EC:2.7.1.191]
K02794	0	2	0	PTS system, mannose-specific IIB component [EC:2.7.1.191]
K02793,K02794	0	14	0	EC: 2.7.1.191
K00844	18	0	16	hexokinase [EC:2.7.1.1]
K01809	18	14	12	mannose-6-phosphate isomerase [EC:5.3.1.8]
K16011	0	14	0	mannose-1-phosphate guanylyltransferase / mannose-6-phosphate isomerase [EC:2.7.7.13 5.3.1.8]
K00850	18	17	14	6-phosphofructokinase 1 [EC:2.7.1.11]
K16370	0	7	0	6-phosphofructokinase 2 [EC:2.7.1.11]
K21071	0	14	0	ATP-dependent phosphofructokinase / diphosphate-dependent phosphofructokinase [EC:2.7.1.11 2.7.1.90]
K01623	18	15	0	fructose-bisphosphate aldolase, class I [EC:4.1.2.13]
K01624	0	16	16	fructose-bisphosphate aldolase, class II [EC:4.1.2.13]
K11645	0	12	0	fructose-bisphosphate aldolase, class I [EC:4.1.2.13]
K01179	18	18	14	endoglucanase [EC:3.2.1.4]
K20542	0	2	0	endoglucanase [EC:3.2.1.4]
K01188	18	16	6	beta-glucosidase [EC:3.2.1.21]
K05349	0	18	16	beta-glucosidase [EC:3.2.1.21]
K05350	18	2	0	beta-glucosidase [EC:3.2.1.21]
K01225	0	0	4	cellulose 1,4-beta-cellobiosidase [EC:3.2.1.91]
K19668	0	0	4	cellulose 1,4-beta-cellobiosidase [EC:3.2.1.91]
K01198	0	4	0	xylan 1,4-beta-xylosidase [EC:3.2.1.37]
K01198,K01209	0	1	1	EC: 3.2.1.37
K01805	0	13	0	xylose isomerase [EC:5.3.1.5]
K00854	18	16	9	xylulokinase [EC:2.7.1.17]
K01783	18	17	6	ribulose-phosphate 3-epimerase [EC:5.1.3.1]
K01051	18	18	4	pectinesterase [EC:3.1.1.11]
K01728	0	3	4	pectate lyase [EC:4.2.2.2]
K19551	0	0	14	pectate lyase C [EC:4.2.2.2 4.2.2.10]
K01730	0	4	0	oligogalacturonide lyase [EC:4.2.2.6]
K01815	0	15	0	4-deoxy-L-threo-5-hexosulose-uronate ketol-isomerase [EC:5.3.1.17]
K00065	0	14	4	2-dehydro-3-deoxy-D-gluconate 5-dehydrogenase [EC:1.1.1.127]
K00448	0	11	0	protocatechuate 3,4-dioxygenase, alpha subunit [EC:1.13.11.3]
K00449	0	13	0	protocatechuate 3,4-dioxygenase, beta subunit [EC:1.13.11.3]
K01857	0	14	0	3-carboxy-cis,cis-muconate cycloisomerase [EC:5.5.1.2]
K01607	0	15	0	4-carboxymuconolactone decarboxylase [EC:4.1.1.44]
K14727	0	3	1	3-oxoadipate enol-lactonase / 4-carboxymuconolactone decarboxylase [EC:3.1.1.24 4.1.1.44]
K01055	0	13	0	3-oxoadipate enol-lactonase [EC:3.1.1.24]
K01031	0	12	0	3-oxoadipate CoA-transferase, alpha subunit [EC:2.8.3.6]
K01032	0	11	0	3-oxoadipate CoA-transferase, beta subunit [EC:2.8.3.6]
K00632	0	17	0	acetyl-CoA acyltransferase [EC:2.3.1.16]
K07508	18	18	0	acetyl-CoA acyltransferase 2 [EC:2.3.1.16]
K07509	18	0	0	acetyl-CoA acyltransferase [EC:2.3.1.16]
K07513	0	0	16	acetyl-CoA acyltransferase 1 [EC:2.3.1.16]
K01804	0	9	0	L-arabinose isomerase [EC:5.3.1.4]
K00853	0	17	0	L-ribulokinase [EC:2.7.1.16]
K03077	0	9	0	L-ribulose-5-phosphate 4-epimerase [EC:5.1.3.4]
K01783	18	17	6	ribulose-phosphate 3-epimerase [EC:5.1.3.1]
K01813	0	11	0	L-rhamnose isomerase [EC:5.3.1.14]
K01820	0	5	0	L-rhamnose isomerase / sugar isomerase [EC:5.3.1.14 5.3.1.-]
K00848	0	11	0	rhamnulokinase [EC:2.7.1.5]
K01629	0	13	0	rhamnulose-1-phosphate aldolase [EC:4.1.2.19]
K01803	18	16	9	triosephosphate isomerase (TIM) [EC:5.3.1.1]

## Sheet: S2
Supplementary Table 2. Functions involved in nitrogen metabolism. The values indicate the total count of samples in which each function is active, categorized by taxonomic group (beetle, Bacteria and Ascomycota)
Name	Beetle	Bacteria	Ascomycota	Function description	Gene names
K02575	0	15	3	MFS transporter, NNP family, nitrate/nitrite transporter	NRT2, narK, nrtP, nasA
K15576	0	14	0	nitrate/nitrite transport system substrate-binding protein	nrtA, nasF, cynA
K15577	0	12	0	nitrate/nitrite transport system permease protein	nrtB, nasE, cynB
K15578	0	12	0	nitrate/nitrite transport system ATP-binding protein [EC:7.3.2.4]	nrtC, nasD
K10534	0	0	5	nitrate reductase (NAD(P)H) [EC:1.7.1.1 1.7.1.2 1.7.1.3]	NR
K00370	0	14	0	nitrate reductase / nitrite oxidoreductase, alpha subunit [EC:1.7.5.1 1.7.99.-]	narG, narZ, nxrA
K00371	0	15	0	nitrate reductase / nitrite oxidoreductase, beta subunit [EC:1.7.5.1 1.7.99.-]	narH, narY, nxrB
K00374	0	12	0	nitrate reductase gamma subunit [EC:1.7.5.1 1.7.99.-]	narI, narV
K00362	0	15	0	nitrite reductase (NADH) large subunit [EC:1.7.1.15]	nirB
K00363	0	13	0	nitrite reductase (NADH) small subunit [EC:1.7.1.15]	nirD
K01501	0	7	5	nitrilase [EC:3.5.5.1]
K15371	0	16	15	glutamate dehydrogenase [EC:1.4.1.2]	GDH2
K00261	18	13	0	glutamate dehydrogenase (NAD(P)+) [EC:1.4.1.3]	GLUD1_2, gdhA
K00262	0	12	15	glutamate dehydrogenase (NADP+) [EC:1.4.1.4]	E1.4.1.4, gdhA
K01915	18	18	16	glutamine synthetase [EC:6.3.1.2]	glnA, GLUL
K00264	18	18	15	glutamate synthase (NADH) [EC:1.4.1.14]	GLT1
K00265	18	17	0	glutamate synthase (NADPH) large chain [EC:1.4.1.13]	gltB
K00266	0	16	0	glutamate synthase (NADPH) small chain [EC:1.4.1.13]	gltD
K00284	0	11	0	glutamate synthase (ferredoxin) [EC:1.4.7.1]	GLU, gltS
K00365	14	0	13	urate oxidase [EC:1.7.3.3]	uaZ
K16839	7	0	0	FAD-dependent urate hydroxylase [EC:1.14.13.113]	hpxO
K07127	13	18	7	5-hydroxyisourate hydrolase [EC:3.5.2.17]	uraH, pucM, hiuH
K13485	9	18	0	2-oxo-4-hydroxy-4-carboxy-5-ureidoimidazoline decarboxylase [EC:4.1.1.97]	PRHOXNB, URAD
K01466	2	0	8	allantoinase [EC:3.5.2.5]	allB
K01477	2	0	13	allantoicase [EC:3.5.3.4]	alc, ALLC
K19964	0	12	0	hydroxyisourate hydrolase [EC:3.5.2.17]	HIUH
K16840	2	0	0	2-oxo-4-hydroxy-4-carboxy-5-ureidoimidazoline decarboxylase [EC:4.1.1.97]	hpxQ

## Sheet: S3
Supplementary Table 3. Functions involved in amino acid metabolism. The values indicate the total count of samples in which each function is active, categorized by taxonomic group (beetle, Bacteria and Ascomycota)
Name	Beetle	Bacteria	Ascomycota	Group	Function description
K00812	0	14	0	Cysteine and methionine metabolism	aspartate aminotransferase [EC:2.6.1.1]
K00813	0	8	0	Cysteine and methionine metabolism	aspartate aminotransferase [EC:2.6.1.1]
K00547	18	10	0	Cysteine and methionine metabolism	homocysteine S-methyltransferase [EC:2.1.1.10]
K00548	0	18	0	Cysteine and methionine metabolism	5-methyltetrahydrofolate--homocysteine methyltransferase [EC:2.1.1.13]
K00549	0	16	18	Cysteine and methionine metabolism	5-methyltetrahydropteroyltriglutamate--homocysteine methyltransferase [EC:2.1.1.14]
K00832	0	15	0	Cysteine and methionine metabolism	aromatic-amino-acid transaminase [EC:2.6.1.57]
K00826	18	15	13	Cysteine and methionine metabolism	branched-chain amino acid aminotransferase [EC:2.6.1.42]
K01739	0	16	0	Cysteine and methionine metabolism	cystathionine gamma-synthase [EC:2.5.1.48]
K13034	0	0	0	Cysteine and methionine metabolism	L-3-cyanoalanine synthase/ cysteine synthase [EC:2.5.1.47 4.4.1.9]
K01011	17	14	7	Cysteine and methionine metabolism	thiosulfate/3-mercaptopyruvate sulfurtransferase [EC:2.8.1.1 2.8.1.2]
K00640	0	15	0	Cysteine and methionine metabolism	serine O-acetyltransferase [EC:2.3.1.30]
K00641	0	15	11	Cysteine and methionine metabolism	homoserine O-acetyltransferase/O-succinyltransferase [EC:2.3.1.31 2.3.1.46]
K00651	0	11	0	Cysteine and methionine metabolism	homoserine O-succinyltransferase/O-acetyltransferase [EC:2.3.1.46 2.3.1.31]
K01738	0	18	3	Cysteine and methionine metabolism	cysteine synthase [EC:2.5.1.47]
K10764	0	14	0	Cysteine and methionine metabolism	O-succinylhomoserine sulfhydrylase [EC:2.5.1.-]
K17069	0	0	13	Cysteine and methionine metabolism	O-acetylhomoserine/O-acetylserine sulfhydrylase [EC:2.5.1.49 2.5.1.47]
K14454	18	0	11	Cysteine and methionine metabolism	aspartate aminotransferase, cytoplasmic [EC:2.6.1.1]
K14455	18	0	10	Cysteine and methionine metabolism	aspartate aminotransferase, mitochondrial [EC:2.6.1.1]
K00016	18	14	0	Cysteine and methionine metabolism	L-lactate dehydrogenase [EC:1.1.1.27]
K00024	0	15	0	Cysteine and methionine metabolism	malate dehydrogenase [EC:1.1.1.37]
K00025	18	0	0	Cysteine and methionine metabolism	malate dehydrogenase [EC:1.1.1.37]
K00026	18	0	14	Cysteine and methionine metabolism	malate dehydrogenase [EC:1.1.1.37]
K00456	18	0	1	Cysteine and methionine metabolism	cysteine dioxygenase [EC:1.13.11.20]
K14155	0	9	0	Cysteine and methionine metabolism	cysteine-S-conjugate beta-lyase [EC:4.4.1.13]
K01760	0	15	7	Cysteine and methionine metabolism	cysteine-S-conjugate beta-lyase [EC:4.4.1.13]
K01761	0	13	0	Cysteine and methionine metabolism	methionine-gamma-lyase [EC:4.4.1.11]
K11204	18	0	11	Cysteine and methionine metabolism	glutamate--cysteine ligase catalytic subunit [EC:6.3.2.2]
K21456	18	0	1	Cysteine and methionine metabolism	glutathione synthase [EC:6.3.2.3]
K11205	18	0	0	Cysteine and methionine metabolism	glutamate--cysteine ligase regulatory subunit
K01919	0	17	0	Cysteine and methionine metabolism	glutamate--cysteine ligase [EC:6.3.2.2]
K01920	0	15	0	Cysteine and methionine metabolism	glutathione synthase [EC:6.3.2.3]
K00815	13	0	0	Cysteine and methionine metabolism	tyrosine aminotransferase [EC:2.6.1.5]
K00816	18	0	0	Cysteine and methionine metabolism	kynurenine---oxoglutarate transaminase / cysteine-S-conjugate beta-lyase / glutamine---phenylpyruvate transaminase [EC:2.6.1.7 4.4.1.13 2.6.1.64]
K00838	0	0	9	Cysteine and methionine metabolism	aromatic amino acid aminotransferase I / 2-aminoadipate transaminase [EC:2.6.1.57 2.6.1.39 2.6.1.27 2.6.1.5]
K00797	18	16	12	Cysteine and methionine metabolism	spermidine synthase [EC:2.5.1.16]
K00802	18	0	3	Cysteine and methionine metabolism	spermine synthase [EC:2.5.1.22]
K01611	18	11	12	Cysteine and methionine metabolism	S-adenosylmethionine decarboxylase [EC:4.1.1.50]
K00558	18	16	5	Cysteine and methionine metabolism	DNA (cytosine-5)-methyltransferase 1 [EC:2.1.1.37]
K17398	18	0	0	Cysteine and methionine metabolism	DNA (cytosine-5)-methyltransferase 3A [EC:2.1.1.37]
K13061	0	9	0	Cysteine and methionine metabolism	acyl homoserine lactone synthase [EC:2.3.1.184]
K20772	0	0	0	Cysteine and methionine metabolism	1-aminocyclopropane-1-carboxylate synthase 1/2/6 [EC:4.4.1.14]
K07173	0	17	0	Cysteine and methionine metabolism	S-ribosylhomocysteine lyase [EC:4.4.1.21]
K13060	0	11	0	Cysteine and methionine metabolism	acyl homoserine lactone synthase [EC:2.3.1.184]
K20248	0	4	0	Cysteine and methionine metabolism	acyl homoserine lactone synthase [EC:2.3.1.184]
K01251	18	17	16	Cysteine and methionine metabolism	adenosylhomocysteinase [EC:3.3.1.1]
K01762	0	0	0	Cysteine and methionine metabolism	1-aminocyclopropane-1-carboxylate synthase [EC:4.4.1.14]
K08969	0	0	0	Cysteine and methionine metabolism	aminotransferase [EC:2.6.1.-]
K00772	18	2	3	Cysteine and methionine metabolism	5'-methylthioadenosine phosphorylase [EC:2.4.2.28]
K00789	18	18	13	Cysteine and methionine metabolism	S-adenosylmethionine synthetase [EC:2.5.1.6]
K00899	0	15	0	Cysteine and methionine metabolism	5-methylthioribose kinase [EC:2.7.1.100]
K01243	0	14	0	Cysteine and methionine metabolism	adenosylhomocysteine nucleosidase [EC:3.2.2.9]
K01244	0	0	0	Cysteine and methionine metabolism	5'-methylthioadenosine nucleosidase [EC:3.2.2.16]
K01505	0	10	0	Cysteine and methionine metabolism	1-aminocyclopropane-1-carboxylate deaminase [EC:3.5.99.7]
K01740	0	15	0	Cysteine and methionine metabolism	O-acetylhomoserine (thiol)-lyase [EC:2.5.1.49]
K05396	0	11	0	Cysteine and methionine metabolism	D-cysteine desulfhydrase [EC:4.4.1.15]
K05933	0	10	0	Cysteine and methionine metabolism	aminocyclopropanecarboxylate oxidase [EC:1.14.17.4]
K08963	18	15	4	Cysteine and methionine metabolism	methylthioribose-1-phosphate isomerase [EC:5.3.1.23]
K08964	18	12	0	Cysteine and methionine metabolism	methylthioribulose-1-phosphate dehydratase [EC:4.2.1.109]
K08966	0	0	4	Cysteine and methionine metabolism	2-hydroxy-3-keto-5-methylthiopentenyl-1-phosphate phosphatase [EC:3.1.3.87]
K08967	18	12	15	Cysteine and methionine metabolism	1,2-dihydroxy-3-keto-5-methylthiopentene dioxygenase [EC:1.13.11.53 1.13.11.54]
K08968	0	12	5	Cysteine and methionine metabolism	L-methionine (R)-S-oxide reductase [EC:1.8.4.14]
K09880	18	13	2	Cysteine and methionine metabolism	enolase-phosphatase E1 [EC:3.1.3.77]
K12339	0	11	0	Cysteine and methionine metabolism	S-sulfo-L-cysteine synthase (O-acetyl-L-serine-dependent) [EC:2.5.1.144]
K12960	0	11	0	Cysteine and methionine metabolism	5-methylthioadenosine/S-adenosylhomocysteine deaminase [EC:3.5.4.31 3.5.4.28]
K16054	0	0	0	Cysteine and methionine metabolism	methylthioribulose 1-phosphate dehydratase / enolase-phosphatase E1 [EC:4.2.1.109 3.1.3.77]
K16843	0	0	0	Cysteine and methionine metabolism	(S)-sulfolactate dehydrogenase [EC:1.1.1.310]
K16844	0	8	0	Cysteine and methionine metabolism	(2R)-3-sulfolactate dehydrogenase (NADP+) [EC:1.1.1.338]
K16846	0	1	0	Cysteine and methionine metabolism	(2R)-sulfolactate sulfo-lyase subunit beta [EC:4.4.1.24]
K17216	0	0	0	Cysteine and methionine metabolism	cystathionine beta-synthase (O-acetyl-L-serine) [EC:2.5.1.134]
K17462	0	0	0	Cysteine and methionine metabolism	putative AdoMet-dependent methyltransferase [EC:2.1.1.-]
K17950	0	4	0	Cysteine and methionine metabolism	L-cysteate sulfo-lyase [EC:4.4.1.25]
K19696	0	3	0	Cysteine and methionine metabolism	5'-methylthioinosine phosphorylase [EC:2.4.2.44]
K22207	0	0	0	Cysteine and methionine metabolism	L-cysteine desulfhydrase [EC:4.4.1.28]
K03334	0	0	0	Cysteine and methionine metabolism	L-amino-acid oxidase [EC:1.4.3.2]
K00811	0	0	0	Cysteine and methionine metabolism	aspartate aminotransferase, chloroplastic [EC:2.6.1.1]
K11358	0	0	0	Cysteine and methionine metabolism	aspartate aminotransferase [EC:2.6.1.1]
K09758	0	13	0	Cysteine and methionine metabolism	aspartate 4-decarboxylase [EC:4.1.1.12]
K00872	0	11	12	Glycin , serin, threonin	homoserine kinase [EC:2.7.1.39]
K02204	0	13	0	Glycin , serin, threonin	homoserine kinase type II [EC:2.7.1.39]
K01695	0	12	0	Glycin , serin, threonin	tryptophan synthase alpha chain [EC:4.2.1.20]
K01696	0	17	0	Glycin , serin, threonin	tryptophan synthase beta chain [EC:4.2.1.20]
K06001	0	9	3	Glycin , serin, threonin	tryptophan synthase beta chain [EC:4.2.1.20]
K01733	0	15	15	Glycin , serin, threonin	threonine synthase [EC:4.2.3.1]
K16066	18	12	7	Glycin , serin, threonin	3-hydroxy acid dehydrogenase / malonic semialdehyde reductase [EC:1.1.1.381 1.1.1.-]
K00998	0	10	0	Glycin , serin, threonin	CDP-diacylglycerol---serine O-phosphatidyltransferase [EC:2.7.8.8]
K17103	0	12	2	Glycin , serin, threonin	CDP-diacylglycerol---serine O-phosphatidyltransferase [EC:2.7.8.8]
K17217	0	0	0	Glycin , serin, threonin	cystathionine gamma-lyase / homocysteine desulfhydrase [EC:4.4.1.1 4.4.1.2]
K00831	18	18	4	Glycin , serin, threonin	phosphoserine aminotransferase [EC:2.6.1.52]
K00058	18	16	8	Glycin , serin, threonin	D-3-phosphoglycerate dehydrogenase / 2-oxoglutarate reductase [EC:1.1.1.95 1.1.1.399]
K01079	18	15	0	Glycin , serin, threonin	phosphoserine phosphatase [EC:3.1.3.3]
K02203	0	2	0	Glycin , serin, threonin	phosphoserine / homoserine phosphotransferase [EC:3.1.3.3 2.7.1.39]
K00049	18	0	0	Glycin , serin, threonin	glyoxylate/hydroxypyruvate reductase [EC:1.1.1.79 1.1.1.81]
K12972	18	14	0	Glycin , serin, threonin	glyoxylate/hydroxypyruvate reductase [EC:1.1.1.79 1.1.1.81]
K00090	0	14	0	Glycin , serin, threonin	glyoxylate/hydroxypyruvate/2-ketogluconate reductase [EC:1.1.1.79 1.1.1.81 1.1.1.215]
K11529	18	13	0	Glycin , serin, threonin	glycerate 2-kinase [EC:2.7.1.165]
K00865	0	13	0	Glycin , serin, threonin	glycerate 2-kinase [EC:2.7.1.165]
K15918	0	6	0	Glycin , serin, threonin	D-glycerate 3-kinase [EC:2.7.1.31]
K00600	18	17	14	Glycin , serin, threonin	glycine hydroxymethyltransferase [EC:2.1.2.1]
K00018	0	5	1	Glycin , serin, threonin	glycerate dehydrogenase [EC:1.1.1.29]
K00830	18	9	4	Glycin , serin, threonin	alanine-glyoxylate transaminase / serine-glyoxylate transaminase / serine-pyruvate transaminase [EC:2.6.1.44 2.6.1.45 2.6.1.51]
K14272	0	0	0	Glycin , serin, threonin	glutamate--glyoxylate aminotransferase [EC:2.6.1.4 2.6.1.2 2.6.1.44]
K00605	18	15	8	Glycin , serin, threonin	aminomethyltransferase [EC:2.1.2.10]
K00050	0	10	0	Glycin , serin, threonin	hydroxypyruvate reductase [EC:1.1.1.81]
K00281	18	17	16	Glycin , serin, threonin	glycine dehydrogenase [EC:1.4.4.2]
K00282	0	6	0	Glycin , serin, threonin	glycine dehydrogenase subunit 1 [EC:1.4.4.2]
K00283	0	3	0	Glycin , serin, threonin	glycine dehydrogenase subunit 2 [EC:1.4.4.2]
K02437	18	13	11	Glycin , serin, threonin	glycine cleavage system H protein
K15893	0	0	0	Glycin , serin, threonin	glycerate dehydrogenase [EC:1.1.1.29]
K15919	0	14	0	Glycin , serin, threonin	glyoxylate/hydroxypyruvate reductase [EC:1.1.1.79 1.1.1.81]
K01834	18	16	6	Glycin , serin, threonin	2,3-bisphosphoglycerate-dependent phosphoglycerate mutase [EC:5.4.2.11]
K15633	0	7	14	Glycin , serin, threonin	2,3-bisphosphoglycerate-independent phosphoglycerate mutase [EC:5.4.2.12]
K15634	0	16	0	Glycin , serin, threonin	probable phosphoglycerate mutase [EC:5.4.2.12]
K15635	0	0	0	Glycin , serin, threonin	2,3-bisphosphoglycerate-independent phosphoglycerate mutase [EC:5.4.2.12]
K00382	18	17	15	Glycin , serin, threonin	dihydrolipoamide dehydrogenase [EC:1.8.1.4]
K14085	18	0	0	Glycin , serin, threonin	aldehyde dehydrogenase family 7 member A1 [EC:1.2.1.31 1.2.1.8 1.2.1.3]
K00643	18	10	10	Glycin , serin, threonin	5-aminolevulinate synthase [EC:2.3.1.37]
K01754	18	17	12	Glycin , serin, threonin	threonine dehydratase [EC:4.3.1.19]
K00276	0	1	14	Glycin , serin, threonin	primary-amine oxidase [EC:1.4.3.21]
K01694	0	0	11	Glycin , serin, threonin	tryptophan synthase [EC:4.2.1.20]
K00306	0	0	7	Glycin , serin, threonin	sarcosine oxidase / L-pipecolate oxidase [EC:1.5.3.1 1.5.3.7]
K01758	18	18	7	Glycin , serin, threonin	cystathionine gamma-lyase [EC:4.4.1.1]
K17989	0	9	3	Glycin , serin, threonin	L-serine/L-threonine ammonia-lyase [EC:4.3.1.17 4.3.1.19]
K00133	0	18	2	Glycin , serin, threonin	aspartate-semialdehyde dehydrogenase [EC:1.2.1.11]
K00928	0	14	10	Glycin , serin, threonin	aspartate kinase [EC:2.7.2.4]
K12524	0	14	0	Glycin , serin, threonin	bifunctional aspartokinase / homoserine dehydrogenase 1 [EC:2.7.2.4 1.1.1.3]
K12525	0	14	0	Glycin , serin, threonin	bifunctional aspartokinase / homoserine dehydrogenase 2 [EC:2.7.2.4 1.1.1.3]
K12526	0	5	0	Glycin , serin, threonin	bifunctional diaminopimelate decarboxylase / aspartate kinase [EC:4.1.1.20 2.7.2.4]
K00003	0	13	7	Glycin , serin, threonin	homoserine dehydrogenase [EC:1.1.1.3]
K00544	0	0	0	Glycin , serin, threonin	betaine-homocysteine S-methyltransferase [EC:2.1.1.5]
K01697	18	8	12	Glycin , serin, threonin	cystathionine beta-synthase [EC:4.2.1.22]
K01752	0	16	0	Glycin , serin, threonin	L-serine dehydratase [EC:4.3.1.17]
K00273	18	10	5	Glycin , serin, threonin	D-amino-acid oxidase [EC:1.4.3.3]
K00274	0	13	1	Glycin , serin, threonin	monoamine oxidase [EC:1.4.3.4]
K00613	0	8	0	Glycin , serin, threonin	glycine amidinotransferase [EC:2.1.4.1]
K08688	0	0	0	Glycin , serin, threonin	creatinase [EC:3.5.3.3]
K00639	0	15	0	Glycin , serin, threonin	glycine C-acetyltransferase [EC:2.3.1.29]
K00836	0	10	0	Glycin , serin, threonin	diaminobutyrate-2-oxoglutarate transaminase [EC:2.6.1.76]
K00060	0	14	0	Glycin , serin, threonin	threonine 3-dehydrogenase [EC:1.1.1.103]
K00108	18	17	17	Glycin , serin, threonin	choline dehydrogenase [EC:1.1.99.1]
K00130	0	17	12	Glycin , serin, threonin	betaine-aldehyde dehydrogenase [EC:1.2.1.8]
K00301	0	0	0	Glycin , serin, threonin	sarcosine oxidase [EC:1.5.3.1]
K00302	0	13	0	Glycin , serin, threonin	sarcosine oxidase, subunit alpha [EC:1.5.3.1]
K00303	0	15	0	Glycin , serin, threonin	sarcosine oxidase, subunit beta [EC:1.5.3.1]
K00304	0	5	0	Glycin , serin, threonin	sarcosine oxidase, subunit delta [EC:1.5.3.1]
K00305	0	7	0	Glycin , serin, threonin	sarcosine oxidase, subunit gamma [EC:1.5.3.1]
K00314	18	1	0	Glycin , serin, threonin	sarcosine dehydrogenase [EC:1.5.8.3]
K00315	0	17	0	Glycin , serin, threonin	dimethylglycine dehydrogenase [EC:1.5.8.4]
K00499	0	11	0	Glycin , serin, threonin	choline monooxygenase [EC:1.14.15.7]
K00552	18	0	0	Glycin , serin, threonin	glycine N-methyltransferase [EC:2.1.1.20]
K01620	18	15	8	Glycin , serin, threonin	threonine aldolase [EC:4.1.2.48]
K01753	0	13	0	Glycin , serin, threonin	D-serine dehydratase [EC:4.3.1.18]
K06718	0	3	0	Glycin , serin, threonin	L-2,4-diaminobutyric acid acetyltransferase [EC:2.3.1.178]
K10674	0	7	0	Glycin , serin, threonin	ectoine hydroxylase [EC:1.14.11.55]
K12235	0	0	0	Glycin , serin, threonin	serine racemase [EC:5.1.1.18]
K13745	0	7	0	Glycin , serin, threonin	L-2,4-diaminobutyrate decarboxylase [EC:4.1.1.86]
K15784	0	0	0	Glycin , serin, threonin	N2-acetyl-L-2,4-diaminobutanoate deacetylase [EC:3.5.1.125]
K15786	0	0	0	Glycin , serin, threonin	aspartate-semialdehyde dehydrogenase [EC:1.2.1.-]
K15789	0	0	0	Glycin , serin, threonin	threonine 3-dehydrogenase [EC:1.1.1.103]
K18897	0	0	0	Glycin , serin, threonin	sarcosine/dimethylglycine N-methyltransferase [EC:2.1.1.157]
K20498	0	0	9	Glycin , serin, threonin	D-serine ammonia-lyase [EC:4.3.1.18]
K00827	18	4	0	Glycin , serin, threonin	alanine-glyoxylate transaminase / (R)-3-amino-2-methylpropionate-pyruvate transaminase [EC:2.6.1.44 2.6.1.40]
K00013	0	18	0	Histidine metabolism	histidinol dehydrogenase [EC:1.1.1.23]
K00765	0	14	7	Histidine metabolism	ATP phosphoribosyltransferase [EC:2.4.2.17]
K01089	0	8	0	Histidine metabolism	imidazoleglycerol-phosphate dehydratase / histidinol-phosphatase [EC:4.2.1.19 3.1.3.15]
K04486	0	0	5	Histidine metabolism	histidinol-phosphatase (PHP family) [EC:3.1.3.15]
K01496	0	12	0	Histidine metabolism	phosphoribosyl-AMP cyclohydrolase [EC:3.5.4.19]
K11755	0	3	0	Histidine metabolism	phosphoribosyl-ATP pyrophosphohydrolase / phosphoribosyl-AMP cyclohydrolase [EC:3.6.1.31 3.5.4.19]
K01523	0	13	0	Histidine metabolism	phosphoribosyl-ATP pyrophosphohydrolase [EC:3.6.1.31]
K01693	0	10	4	Histidine metabolism	imidazoleglycerol-phosphate dehydratase [EC:4.2.1.19]
K02500	0	15	0	Histidine metabolism	imidazole glycerol-phosphate synthase subunit HisF [EC:4.3.2.10]
K02501	0	11	0	Histidine metabolism	imidazole glycerol-phosphate synthase subunit HisH [EC:4.3.2.10]
K01814	0	14	0	Histidine metabolism	phosphoribosylformimino-5-aminoimidazole carboxamide ribotide isomerase [EC:5.3.1.16]
K00817	0	15	2	Histidine metabolism	histidinol-phosphate aminotransferase [EC:2.6.1.9]
K01458	0	14	0	Histidine metabolism	N-formylglutamate deformylase [EC:3.5.1.68]
K00128	18	18	16	Histidine metabolism	aldehyde dehydrogenase (NAD+) [EC:1.2.1.3]
K00149	0	0	0	Histidine metabolism	aldehyde dehydrogenase family 9 member A1 [EC:1.2.1.47 1.2.1.3]
K00129	0	0	15	Histidine metabolism	aldehyde dehydrogenase (NAD(P)+) [EC:1.2.1.5]
K18649	0	6	0	Histidine metabolism	inositol-phosphate phosphatase / L-galactose 1-phosphate phosphatase / histidinol-phosphatase [EC:3.1.3.25 3.1.3.93 3.1.3.15]
K13990	0	0	0	Histidine metabolism	glutamate formiminotransferase / formiminotetrahydrofolate cyclodeaminase [EC:2.1.2.5 4.3.1.4]
K00603	0	0	0	Histidine metabolism	glutamate formiminotransferase / 5-formyltetrahydrofolate cyclo-ligase [EC:2.1.2.5 6.3.3.2]
K01468	0	16	0	Histidine metabolism	imidazolonepropionase [EC:3.5.2.7]
K01479	0	13	0	Histidine metabolism	formiminoglutamase [EC:3.5.3.8]
K01590	16	0	0	Histidine metabolism	histidine decarboxylase [EC:4.1.1.22]
K01663	0	0	7	Histidine metabolism	imidazole glycerol-phosphate synthase [EC:4.3.2.10]
K01712	0	17	0	Histidine metabolism	urocanate hydratase [EC:4.2.1.49]
K01745	0	16	0	Histidine metabolism	histidine ammonia-lyase [EC:4.3.1.3]
K02502	0	15	0	Histidine metabolism	ATP phosphoribosyltransferase regulatory subunit
K05602	0	5	0	Histidine metabolism	histidinol-phosphatase [EC:3.1.3.15]
K05603	0	15	0	Histidine metabolism	formimidoylglutamate deiminase [EC:3.5.3.13]
K07008	0	0	0	Histidine metabolism	gamma-glutamyl hercynylcysteine S-oxide hydrolase [EC:3.5.1.118]
K14152	0	0	11	Histidine metabolism	phosphoribosyl-ATP pyrophosphohydrolase / phosphoribosyl-AMP cyclohydrolase / histidinol dehydrogenase [EC:3.6.1.31 3.5.4.19 1.1.1.23]
K18911	0	10	0	Histidine metabolism	L-histidine Nalpha-methyltransferase [EC:2.1.1.44]
K18912	0	11	0	Histidine metabolism	gamma-glutamyl hercynylcysteine S-oxide synthase [EC:1.14.99.50]
K19787	18	0	4	Histidine metabolism	carnosine N-methyltransferase [EC:2.1.1.22]
K20246	0	3	3	Histidine metabolism	L-histidine Nalpha-methyltransferase / hercynylcysteine S-oxide synthase [EC:2.1.1.44 1.14.99.51]
K20247	0	0	5	Histidine metabolism	hercynylcysteine S-oxide lyase [EC:4.4.1.36]
K08660	18	2	0	Histidine metabolism	cytosolic nonspecific dipeptidase [EC:3.4.13.18]
K00821	0	15	0	Lysine biosynthesis	acetylornithine/N-succinyldiaminopimelate aminotransferase [EC:2.6.1.11 2.6.1.17]
K00215	0	14	0	Lysine biosynthesis	4-hydroxy-tetrahydrodipicolinate reductase [EC:1.17.1.8]
K00674	0	17	0	Lysine biosynthesis	2,3,4,5-tetrahydropyridine-2,6-dicarboxylate N-succinyltransferase [EC:2.3.1.117]
K14267	0	9	0	Lysine biosynthesis	N-succinyldiaminopimelate aminotransferase [EC:2.6.1.17]
K01439	0	17	0	Lysine biosynthesis	succinyl-diaminopimelate desuccinylase [EC:3.5.1.18]
K01586	0	12	0	Lysine biosynthesis	diaminopimelate decarboxylase [EC:4.1.1.20]
K01714	0	16	0	Lysine biosynthesis	4-hydroxy-tetrahydrodipicolinate synthase [EC:4.3.3.7]
K01778	0	14	0	Lysine biosynthesis	diaminopimelate epimerase [EC:5.1.1.7]
K16792	0	0	0	Lysine biosynthesis	methanogen homoaconitase large subunit [EC:4.2.1.114]
K01655	0	0	14	Lysine biosynthesis	homocitrate synthase [EC:2.3.3.14]
K01929	0	15	0	Lysine biosynthesis	UDP-N-acetylmuramoyl-tripeptide--D-alanyl-D-alanine ligase [EC:6.3.2.10]
K01928	0	16	0	Lysine biosynthesis	UDP-N-acetylmuramoyl-L-alanyl-D-glutamate--2,6-diaminopimelate ligase [EC:6.3.2.13]
K15792	0	0	0	Lysine biosynthesis	murE/murF fusion protein [EC:6.3.2.13 6.3.2.10]
K00825	18	0	0	Lysine biosynthesis	kynurenine/2-aminoadipate aminotransferase [EC:2.6.1.7 2.6.1.39]
K00290	18	12	9	Lysine biosynthesis	saccharopine dehydrogenase (NAD+, L-lysine forming) [EC:1.5.1.7]
K00293	0	0	10	Lysine biosynthesis	saccharopine dehydrogenase (NADP+, L-glutamate forming) [EC:1.5.1.10]
K05830	0	7	0	Lysine biosynthesis	LysW-gamma-L-lysine/LysW-L-ornithine aminotransferase [EC:2.6.1.-]
K05828	0	0	0	Lysine biosynthesis	LysW-gamma-L-alpha-aminoadipate/LysW-L-glutamate kinase [EC:2.7.2.-]
K05829	0	0	0	Lysine biosynthesis	LysW-gamma-L-alpha-aminoadipyl-6-phosphate/LysW-L-glutamyl-5-phosphate reductase [EC:1.2.1.-]
K05831	0	1	0	Lysine biosynthesis	LysW-gamma-L-lysine/LysW-L-ornithine carboxypeptidase
K05823	0	0	0	Lysine biosynthesis	N-acetyldiaminopimelate deacetylase [EC:3.5.1.47]
K00841	0	0	0	Lysine biosynthesis	aminotransferase [EC:2.6.1.-]
K10206	0	7	0	Lysine biosynthesis	LL-diaminopimelate aminotransferase [EC:2.6.1.83]
K00143	0	0	14	Lysine biosynthesis	L-2-aminoadipate reductase [EC:1.2.1.95]
K01705	0	0	10	Lysine biosynthesis	homoaconitate hydratase [EC:4.2.1.36]
K03340	0	10	0	Lysine biosynthesis	diaminopimelate dehydrogenase [EC:1.4.1.16]
K05822	0	0	0	Lysine biosynthesis	tetrahydrodipicolinate N-acetyltransferase [EC:2.3.1.89]
K05824	0	0	0	Lysine biosynthesis	homoisocitrate dehydrogenase [EC:1.1.1.87]
K05825	0	15	0	Lysine biosynthesis	2-aminoadipate transaminase [EC:2.6.1.-]
K17450	0	0	10	Lysine biosynthesis	homoaconitase [EC:4.2.1.-]
K00529	18	13	0	Phenylalanine metabolism	3-phenylpropionate/trans-cinnamate dioxygenase ferredoxin reductase component [EC:1.18.1.3]
K04073	0	4	0	Phenylalanine metabolism	acetaldehyde dehydrogenase [EC:1.2.1.10]
K01692	18	15	0	Phenylalanine metabolism	enoyl-CoA hydratase [EC:4.2.1.17]
K00074	0	15	0	Phenylalanine metabolism	3-hydroxybutyryl-CoA dehydrogenase [EC:1.1.1.157]
K00055	0	0	6	Phenylalanine metabolism	aryl-alcohol dehydrogenase [EC:1.1.1.90]
K00457	18	13	13	Phenylalanine metabolism	4-hydroxyphenylpyruvate dioxygenase [EC:1.13.11.27]
K01593	18	4	2	Phenylalanine metabolism	aromatic-L-amino-acid/L-tryptophan decarboxylase [EC:4.1.1.28 4.1.1.105]
K05821	0	0	5	Phenylalanine metabolism	aromatic amino acid aminotransferase II [EC:2.6.1.58 2.6.1.28]
K15849	0	7	0	Phenylalanine metabolism	bifunctional aspartate aminotransferase and glutamate/aspartate-prephenate aminotransferase [EC:2.6.1.1 2.6.1.78 2.6.1.79]
K07253	18	0	0	Phenylalanine metabolism	phenylpyruvate tautomerase [EC:5.3.2.1]
K10437	0	0	1	Phenylalanine metabolism	phenylacetate 2-hydroxylase [EC:1.14.14.54]
K00146	18	12	0	Phenylalanine metabolism	phenylacetaldehyde dehydrogenase [EC:1.2.1.39]
K01666	0	3	0	Phenylalanine metabolism	4-hydroxy 2-oxovalerate aldolase [EC:4.1.3.39]
K02554	0	4	0	Phenylalanine metabolism	2-keto-4-pentenoate hydratase [EC:4.2.1.80]
K00487	0	0	0	Phenylalanine metabolism	trans-cinnamate 4-monooxygenase [EC:1.14.14.91]
K01904	18	0	8	Phenylalanine metabolism	4-coumarate--CoA ligase [EC:6.2.1.12]
K00588	0	8	0	Phenylalanine metabolism	caffeoyl-CoA O-methyltransferase [EC:2.1.1.104]
K10775	0	0	0	Phenylalanine metabolism	phenylalanine ammonia-lyase [EC:4.3.1.24]
K03782	0	14	13	Phenylalanine metabolism	catalase-peroxidase [EC:1.11.1.21]
K00500	18	14	0	Phenylalanine metabolism	phenylalanine-4-hydroxylase [EC:1.14.16.1]
K01912	0	11	0	Phenylalanine metabolism	phenylacetate-CoA ligase [EC:6.2.1.30]
K01451	0	17	0	Phenylalanine metabolism	hippurate hydrolase [EC:3.5.1.32]
K00285	0	16	0	Phenylalanine metabolism	D-amino-acid dehydrogenase [EC:1.4.5.1]
K02609	0	10	0	Phenylalanine metabolism	ring-1,2-phenylacetyl-CoA epoxidase subunit PaaA [EC:1.14.13.149]
K02610	0	9	0	Phenylalanine metabolism	ring-1,2-phenylacetyl-CoA epoxidase subunit PaaB
K02611	0	11	0	Phenylalanine metabolism	ring-1,2-phenylacetyl-CoA epoxidase subunit PaaC [EC:1.14.13.149]
K02612	0	11	0	Phenylalanine metabolism	ring-1,2-phenylacetyl-CoA epoxidase subunit PaaD
K02613	0	11	0	Phenylalanine metabolism	ring-1,2-phenylacetyl-CoA epoxidase subunit PaaE
K02614	0	12	0	Phenylalanine metabolism	acyl-CoA thioesterase [EC:3.1.2.-]
K02615	0	0	0	Phenylalanine metabolism	3-oxo-5,6-didehydrosuberyl-CoA/3-oxoadipyl-CoA thiolase [EC:2.3.1.223 2.3.1.174]
K02618	0	11	0	Phenylalanine metabolism	oxepin-CoA hydrolase / 3-oxo-5,6-dehydrosuberyl-CoA semialdehyde dehydrogenase [EC:3.3.2.12 1.2.1.91]
K05708	0	0	0	Phenylalanine metabolism	3-phenylpropionate/trans-cinnamate dioxygenase subunit alpha [EC:1.14.12.19]
K05709	0	0	0	Phenylalanine metabolism	3-phenylpropionate/trans-cinnamate dioxygenase subunit beta [EC:1.14.12.19]
K05710	18	7	5	Phenylalanine metabolism	3-phenylpropionate/trans-cinnamate dioxygenase ferredoxin component
K05711	0	0	0	Phenylalanine metabolism	2,3-dihydroxy-2,3-dihydrophenylpropionate dehydrogenase [EC:1.3.1.87]
K05712	0	15	0	Phenylalanine metabolism	3-(3-hydroxy-phenyl)propionate hydroxylase [EC:1.14.13.127]
K05713	0	11	0	Phenylalanine metabolism	2,3-dihydroxyphenylpropionate 1,2-dioxygenase [EC:1.13.11.16]
K05714	0	4	0	Phenylalanine metabolism	2-hydroxy-6-oxonona-2,4-dienedioate hydrolase [EC:3.7.1.14]
K10797	0	7	0	Phenylalanine metabolism	2-enoate reductase [EC:1.3.1.31]
K12732	0	0	8	Phenylalanine metabolism	phenylpyruvate decarboxylase [EC:4.1.1.-]
K15866	6	13	0	Phenylalanine metabolism	2-(1,2-epoxy-1,2-dihydrophenyl)acetyl-CoA isomerase [EC:5.3.3.18]
K18383	0	9	0	Phenylalanine metabolism	trans-feruloyl-CoA hydratase / vanillin synthase [EC:4.2.1.101 4.1.2.41]
K18852	0	12	0	Phenylalanine metabolism	D-amino-acid N-acetyltransferase [EC:2.3.1.36]
K21795	1	0	0	Phenylalanine metabolism	phenylalanine 2-monooxygenase [EC:1.13.12.9]
K00824	0	12	0	Phenylalanine metabolism	D-alanine transaminase [EC:2.6.1.21]
K01426	5	17	13	Phenylalanine metabolism	amidase [EC:3.5.1.4]
K14187	0	9	0	Phenylalanine, tyrosine and tryptophan biosynthesis	chorismate mutase / prephenate dehydrogenase [EC:5.4.99.5 1.3.1.12]
K00766	0	16	2	Phenylalanine, tyrosine and tryptophan biosynthesis	anthranilate phosphoribosyltransferase [EC:2.4.2.18]
K13497	0	7	0	Phenylalanine, tyrosine and tryptophan biosynthesis	anthranilate synthase/phosphoribosyltransferase [EC:4.1.3.27 2.4.2.18]
K13853	0	0	0	Phenylalanine, tyrosine and tryptophan biosynthesis	3-deoxy-7-phosphoheptulonate synthase / chorismate mutase [EC:2.5.1.54 5.4.99.5]
K01609	0	15	0	Phenylalanine, tyrosine and tryptophan biosynthesis	indole-3-glycerol phosphate synthase [EC:4.1.1.48]
K13498	0	11	0	Phenylalanine, tyrosine and tryptophan biosynthesis	indole-3-glycerol phosphate synthase / phosphoribosylanthranilate isomerase [EC:4.1.1.48 5.3.1.24]
K01657	0	14	6	Phenylalanine, tyrosine and tryptophan biosynthesis	anthranilate synthase component I [EC:4.1.3.27]
K01658	0	12	0	Phenylalanine, tyrosine and tryptophan biosynthesis	anthranilate synthase component II [EC:4.1.3.27]
K13503	0	14	0	Phenylalanine, tyrosine and tryptophan biosynthesis	anthranilate synthase [EC:4.1.3.27]
K01713	0	13	0	Phenylalanine, tyrosine and tryptophan biosynthesis	cyclohexadienyl dehydratase [EC:4.2.1.51 4.2.1.91]
K04518	0	8	4	Phenylalanine, tyrosine and tryptophan biosynthesis	prephenate dehydratase [EC:4.2.1.51]
K14170	0	14	0	Phenylalanine, tyrosine and tryptophan biosynthesis	chorismate mutase / prephenate dehydratase [EC:5.4.99.5 4.2.1.51]
K01817	0	14	0	Phenylalanine, tyrosine and tryptophan biosynthesis	phosphoribosylanthranilate isomerase [EC:5.3.1.24]
K01850	0	0	5	Phenylalanine, tyrosine and tryptophan biosynthesis	chorismate mutase [EC:5.4.99.5]
K04092	0	5	0	Phenylalanine, tyrosine and tryptophan biosynthesis	chorismate mutase [EC:5.4.99.5]
K04093	0	1	0	Phenylalanine, tyrosine and tryptophan biosynthesis	chorismate mutase [EC:5.4.99.5]
K06208	0	0	0	Phenylalanine, tyrosine and tryptophan biosynthesis	chorismate mutase [EC:5.4.99.5]
K06209	0	0	0	Phenylalanine, tyrosine and tryptophan biosynthesis	chorismate mutase [EC:5.4.99.5]
K18240	0	0	0	Phenylalanine, tyrosine and tryptophan biosynthesis	chorismate lyase / 3-hydroxybenzoate synthase [EC:4.1.3.40 4.1.3.45]
K00210	0	0	0	Phenylalanine, tyrosine and tryptophan biosynthesis	prephenate dehydrogenase [EC:1.3.1.12]
K00220	0	12	0	Phenylalanine, tyrosine and tryptophan biosynthesis	cyclohexadieny/prephenate dehydrogenase [EC:1.3.1.43 1.3.1.12]
K04517	0	12	0	Phenylalanine, tyrosine and tryptophan biosynthesis	prephenate dehydrogenase [EC:1.3.1.12]
K01626	0	18	14	Phenylalanine, tyrosine and tryptophan biosynthesis	3-deoxy-7-phosphoheptulonate synthase [EC:2.5.1.54]
K00014	18	14	0	Phenylalanine, tyrosine and tryptophan biosynthesis	shikimate dehydrogenase [EC:1.1.1.25]
K00211	0	0	10	Phenylalanine, tyrosine and tryptophan biosynthesis	prephenate dehydrogenase (NADP+) [EC:1.3.1.13]
K00800	0	16	0	Phenylalanine, tyrosine and tryptophan biosynthesis	3-phosphoshikimate 1-carboxyvinyltransferase [EC:2.5.1.19]
K00891	0	15	0	Phenylalanine, tyrosine and tryptophan biosynthesis	shikimate kinase [EC:2.7.1.71]
K01656	0	0	0	Phenylalanine, tyrosine and tryptophan biosynthesis	anthranilate synthase / indole-3-glycerol phosphate synthase [EC:4.1.3.27 4.1.1.48]
K01735	0	15	0	Phenylalanine, tyrosine and tryptophan biosynthesis	3-dehydroquinate synthase [EC:4.2.3.4]
K01736	0	14	8	Phenylalanine, tyrosine and tryptophan biosynthesis	chorismate synthase [EC:4.2.3.5]
K03785	0	5	3	Phenylalanine, tyrosine and tryptophan biosynthesis	3-dehydroquinate dehydratase I [EC:4.2.1.10]
K03786	0	18	0	Phenylalanine, tyrosine and tryptophan biosynthesis	3-dehydroquinate dehydratase II [EC:4.2.1.10]
K03856	0	0	0	Phenylalanine, tyrosine and tryptophan biosynthesis	3-deoxy-7-phosphoheptulonate synthase [EC:2.5.1.54]
K04516	0	0	0	Phenylalanine, tyrosine and tryptophan biosynthesis	chorismate mutase [EC:5.4.99.5]
K05358	0	8	0	Phenylalanine, tyrosine and tryptophan biosynthesis	quinate dehydrogenase (quinone) [EC:1.1.5.8]
K05359	0	0	0	Phenylalanine, tyrosine and tryptophan biosynthesis	arogenate/prephenate dehydratase [EC:4.2.1.91 4.2.1.51]
K09483	0	0	0	Phenylalanine, tyrosine and tryptophan biosynthesis	3-dehydroshikimate dehydratase [EC:4.2.1.118]
K09484	0	0	3	Phenylalanine, tyrosine and tryptophan biosynthesis	quinate dehydrogenase [EC:1.1.1.24]
K13501	0	0	5	Phenylalanine, tyrosine and tryptophan biosynthesis	anthranilate synthase / indole-3-glycerol phosphate synthase / phosphoribosylanthranilate isomerase [EC:4.1.3.27 4.1.1.48 5.3.1.24]
K13830	0	0	16	Phenylalanine, tyrosine and tryptophan biosynthesis	pentafunctional AROM polypeptide [EC:4.2.3.4 4.2.1.10 1.1.1.25 2.7.1.71 2.5.1.19]
K13832	0	0	0	Phenylalanine, tyrosine and tryptophan biosynthesis	3-dehydroquinate dehydratase / shikimate dehydrogenase [EC:4.2.1.10 1.1.1.25]
K15227	0	0	0	Phenylalanine, tyrosine and tryptophan biosynthesis	arogenate dehydrogenase (NADP+), plant [EC:1.3.1.78]
K07410	0	0	0	Tryptophan metabolism	cytochrome P450 family 1 subfamily B polypeptide 1 [EC:1.14.14.1]
K07408	0	0	0	Tryptophan metabolism	cytochrome P450 family 1 subfamily A polypeptide 1 [EC:1.14.14.1]
K14338	0	2	6	Tryptophan metabolism	cytochrome P450 / NADPH-cytochrome P450 reductase [EC:1.14.14.1 1.6.2.4]
K00493	0	13	7	Tryptophan metabolism	unspecific monooxygenase [EC:1.14.14.1]
K00252	18	11	0	Tryptophan metabolism	glutaryl-CoA dehydrogenase [EC:1.3.8.6]
K01501	0	7	5	Tryptophan metabolism	nitrilase [EC:3.5.5.1]
K00626	18	17	12	Tryptophan metabolism	acetyl-CoA C-acetyltransferase [EC:2.3.1.9]
K07511	18	0	9	Tryptophan metabolism	enoyl-CoA hydratase [EC:4.2.1.17]
K07515	18	0	0	Tryptophan metabolism	enoyl-CoA hydratase / long-chain 3-hydroxyacyl-CoA dehydrogenase [EC:4.2.1.17 1.1.1.211]
K01782	0	17	0	Tryptophan metabolism	3-hydroxyacyl-CoA dehydrogenase / enoyl-CoA hydratase / 3-hydroxybutyryl-CoA epimerase [EC:1.1.1.35 4.2.1.17 5.1.2.3]
K01825	0	6	0	Tryptophan metabolism	3-hydroxyacyl-CoA dehydrogenase / enoyl-CoA hydratase / 3-hydroxybutyryl-CoA epimerase / enoyl-CoA isomerase [EC:1.1.1.35 4.2.1.17 5.1.2.3 5.3.3.8]
K03781	18	15	15	Tryptophan metabolism	catalase [EC:1.11.1.6]
K01432	18	14	0	Tryptophan metabolism	arylformamidase [EC:3.5.1.9]
K07130	0	12	0	Tryptophan metabolism	arylformamidase [EC:3.5.1.9]
K00164	18	17	16	Tryptophan metabolism	2-oxoglutarate dehydrogenase E1 component [EC:1.2.4.2]
K00022	18	0	0	Tryptophan metabolism	3-hydroxyacyl-CoA dehydrogenase [EC:1.1.1.35]
K10217	0	0	0	Tryptophan metabolism	aminomuconate-semialdehyde/2-hydroxymuconate-6-semialdehyde dehydrogenase [EC:1.2.1.32 1.2.1.85]
K01721	0	7	0	Tryptophan metabolism	nitrile hydratase subunit alpha [EC:4.2.1.84]
K20807	0	7	0	Tryptophan metabolism	nitrile hydratase subunit beta [EC:4.2.1.84]
K00502	18	0	0	Tryptophan metabolism	tryptophan 5-monooxygenase [EC:1.14.16.4]
K11820	0	0	0	Tryptophan metabolism	N-hydroxythioamide S-beta-glucosyltransferase [EC:2.4.1.195]
K11819	0	0	0	Tryptophan metabolism	S-alkyl-thiohydroximate lyase SUR1 [EC:4.4.1.-]
K00463	0	3	11	Tryptophan metabolism	indoleamine 2,3-dioxygenase [EC:1.13.11.52]
K14264	0	0	7	Tryptophan metabolism	kynurenine aminotransferase [EC:2.6.1.7]
K14265	0	0	0	Tryptophan metabolism	tryptophan aminotransferase [EC:2.6.1.27]
K00452	0	2	2	Tryptophan metabolism	3-hydroxyanthranilate 3,4-dioxygenase [EC:1.13.11.6]
K00453	17	16	0	Tryptophan metabolism	tryptophan 2,3-dioxygenase [EC:1.13.11.11]
K00466	0	0	2	Tryptophan metabolism	tryptophan 2-monooxygenase [EC:1.13.12.3]
K00486	12	2	5	Tryptophan metabolism	kynurenine 3-monooxygenase [EC:1.14.13.9]
K01237	18	0	0	Tryptophan metabolism	myrosinase [EC:3.2.1.147]
K01556	0	15	11	Tryptophan metabolism	kynureninase [EC:3.7.1.3]
K01667	0	7	0	Tryptophan metabolism	tryptophanase [EC:4.1.99.1]
K03392	0	0	0	Tryptophan metabolism	aminocarboxymuconate-semialdehyde decarboxylase [EC:4.1.1.45]
K04103	0	2	0	Tryptophan metabolism	indolepyruvate decarboxylase [EC:4.1.1.74]
K11816	0	0	2	Tryptophan metabolism	indole-3-pyruvate monooxygenase [EC:1.14.13.168]
K15067	0	0	0	Tryptophan metabolism	2-aminomuconate deaminase [EC:3.5.99.5]
K16903	0	0	0	Tryptophan metabolism	L-tryptophan---pyruvate aminotransferase [EC:2.6.1.99]
K21801	0	0	0	Tryptophan metabolism	indoleacetamide hydrolase [EC:3.5.1.-]
K22450	0	7	0	Tryptophan metabolism	aralkylamine N-acetyltransferase [EC:2.3.1.87]
K00052	0	16	5	Valine, leucine and isoleucine biosynthesis	3-isopropylmalate dehydrogenase [EC:1.1.1.85]
K00053	0	17	15	Valine, leucine and isoleucine biosynthesis	ketol-acid reductoisomerase [EC:1.1.1.86]
K01652	0	17	16	Valine, leucine and isoleucine biosynthesis	acetolactate synthase I/II/III large subunit [EC:2.2.1.6]
K01653	0	15	7	Valine, leucine and isoleucine biosynthesis	acetolactate synthase I/III small subunit [EC:2.2.1.6]
K11258	0	8	0	Valine, leucine and isoleucine biosynthesis	acetolactate synthase II small subunit [EC:2.2.1.6]
K01687	0	18	14	Valine, leucine and isoleucine biosynthesis	dihydroxy-acid dehydratase [EC:4.2.1.9]
K01703	0	16	0	Valine, leucine and isoleucine biosynthesis	3-isopropylmalate/(R)-2-methylmalate dehydratase large subunit [EC:4.2.1.33 4.2.1.35]
K01704	0	14	0	Valine, leucine and isoleucine biosynthesis	3-isopropylmalate/(R)-2-methylmalate dehydratase small subunit [EC:4.2.1.33 4.2.1.35]
K01649	0	16	14	Valine, leucine and isoleucine biosynthesis	2-isopropylmalate synthase [EC:2.3.3.13]
K09011	0	0	0	Valine, leucine and isoleucine biosynthesis	(R)-citramalate synthase [EC:2.3.1.182]
K00263	0	8	0	Valine, leucine and isoleucine biosynthesis	leucine dehydrogenase [EC:1.4.1.9]
K00835	0	10	0	Valine, leucine and isoleucine biosynthesis	valine--pyruvate aminotransferase [EC:2.6.1.66]
K01702	0	0	14	Valine, leucine and isoleucine biosynthesis	3-isopropylmalate dehydratase [EC:4.2.1.33]
K14260	0	14	0	Valine, leucine and isoleucine biosynthesis	alanine-synthesizing transaminase [EC:2.6.1.66 2.6.1.2]

## Sheet: S4
Supplementary Table 4. Functions involved in vitamin metabolism. The values indicate the total count of samples in which each function is active, categorized by taxonomic group (beetle, Bacteria and Ascomycota)
Name	Beetle	Bacteria	Ascomycota	Group	Function description
K00605	15	18	8	Folate biosynthesis	aminomethyltransferase [EC:2.1.2.10]
K00287	14	18	5	Folate biosynthesis	dihydrofolate reductase [EC:1.5.1.3]
K01495	12	18	6	Folate biosynthesis	GTP cyclohydrolase IA [EC:3.5.4.16]
K01113	13	0	8	Folate biosynthesis	alkaline phosphatase D [EC:3.1.3.1]
K00796	15	0	0	Folate biosynthesis	dihydropteroate synthase [EC:2.5.1.15]
K00950	14	0	0	Folate biosynthesis	2-amino-4-hydroxy-6-hydroxymethyldihydropteridine diphosphokinase [EC:2.7.6.3]
K11754	14	0	0	Folate biosynthesis	dihydrofolate synthase / folylpolyglutamate synthase [EC:6.3.2.12 6.3.2.17]
K01633	13	0	0	Folate biosynthesis	7,8-dihydroneopterin aldolase/epimerase/oxygenase [EC:4.1.2.25 5.1.99.8 1.13.11.81]
K09007	9	0	0	Folate biosynthesis	GTP cyclohydrolase IB [EC:3.5.4.16]
K13940	0	0	0	Folate biosynthesis	dihydroneopterin aldolase / 2-amino-4-hydroxy-6-hydroxymethyldihydropteridine diphosphokinase [EC:4.1.2.25 2.7.6.3]
K13938	0	0	0	Folate biosynthesis	dihydromonapterin reductase / dihydrofolate reductase [EC:1.5.1.50 1.5.1.3]
K05666	18	18	15	Folate biosynthesis and One carbon pool by folate B9	ATP-binding cassette, subfamily C (CFTR/MRP), member 2
K03635	15	18	8	Folate biosynthesis and One carbon pool by folate B9	molybdopterin synthase catalytic subunit [EC:2.8.1.12]
K02619	12	18	6	Folate biosynthesis and One carbon pool by folate B9	4-amino-4-deoxychorismate lyase [EC:4.1.3.38]
K05665	0	18	16	Folate biosynthesis and One carbon pool by folate B9	ATP-binding cassette, subfamily C (CFTR/MRP), member 1 [EC:7.6.2.3]
K05681	0	18	15	Folate biosynthesis and One carbon pool by folate B9	ATP-binding cassette, subfamily G (WHITE), member 2
K01737	14	18	0	Folate biosynthesis and One carbon pool by folate B9	6-pyruvoyltetrahydropterin/6-carboxytetrahydropterin synthase [EC:4.2.3.12 4.1.2.50]
K00500	14	18	0	Folate biosynthesis and One carbon pool by folate B9	phenylalanine-4-hydroxylase [EC:1.14.16.1]
K05667	0	18	14	Folate biosynthesis and One carbon pool by folate B9	ATP-binding cassette, subfamily C (CFTR/MRP), member 3
K01724	13	18	0	Folate biosynthesis and One carbon pool by folate B9	4a-hydroxytetrahydrobiopterin dehydratase [EC:4.2.1.96]
K01938	12	18	0	Folate biosynthesis and One carbon pool by folate B9	formate--tetrahydrofolate ligase [EC:6.3.4.3]
K00011	11	18	1	Folate biosynthesis and One carbon pool by folate B9	aldehyde reductase [EC:1.1.1.21]
K05673	0	18	10	Folate biosynthesis and One carbon pool by folate B9	ATP-binding cassette, subfamily C (CFTR/MRP), member 4
K01930	0	18	7	Folate biosynthesis and One carbon pool by folate B9	folylpolyglutamate synthase [EC:6.3.2.17]
K03639	15	6	3	Folate biosynthesis and One carbon pool by folate B9	GTP 3',8-cyclase [EC:4.1.99.22]
K22391	5	18	0	Folate biosynthesis and One carbon pool by folate B9	GTP cyclohydrolase I [EC:3.5.4.16]
K03637	15	6	0	Folate biosynthesis and One carbon pool by folate B9	cyclic pyranopterin monophosphate synthase [EC:4.6.1.17]
K15631	0	18	3	Folate biosynthesis and One carbon pool by folate B9	molybdenum cofactor sulfurtransferase [EC:2.8.1.9]
K15376	0	18	2	Folate biosynthesis and One carbon pool by folate B9	gephyrin [EC:2.10.1.1 2.7.7.75]
K11787	0	18	0	Folate biosynthesis and One carbon pool by folate B9	phosphoribosylamine--glycine ligase / phosphoribosylglycinamide formyltransferase / phosphoribosylformylglycinamidine cyclo-ligase [EC:6.3.4.13 2.1.2.2 6.3.3.1]
K00310	0	18	0	Folate biosynthesis and One carbon pool by folate B9	pyrimidodiazepine synthase [EC:1.5.4.1]
K00289	0	18	0	Folate biosynthesis and One carbon pool by folate B9	formyltetrahydrofolate dehydrogenase [EC:1.5.1.6]
K13403	0	18	0	Folate biosynthesis and One carbon pool by folate B9	methylenetetrahydrofolate dehydrogenase(NAD+) / 5,10-methenyltetrahydrofolate cyclohydrolase [EC:1.5.1.15 3.5.4.9]
K01307	0	18	0	Folate biosynthesis and One carbon pool by folate B9	gamma-glutamyl hydrolase [EC:3.4.19.9]
K00072	0	18	0	Folate biosynthesis and One carbon pool by folate B9	sepiapterin reductase [EC:1.1.1.153]
K00357	0	18	0	Folate biosynthesis and One carbon pool by folate B9	dihydropteridine reductase [EC:1.5.1.34]
K03750	18	0	0	Folate biosynthesis and One carbon pool by folate B9	molybdopterin molybdotransferase [EC:2.10.1.1]
K20967	0	18	0	Folate biosynthesis and One carbon pool by folate B9	GTP 3',8-cyclase / cyclic pyranopterin monophosphate synthase [EC:4.1.99.22 4.6.1.17]
K00079	0	18	0	Folate biosynthesis and One carbon pool by folate B9	carbonyl reductase 1 [EC:1.1.1.184 1.1.1.189 1.1.1.197]
K00502	0	18	0	Folate biosynthesis and One carbon pool by folate B9	tryptophan 5-monooxygenase [EC:1.14.16.4]
K14613	0	18	0	Folate biosynthesis and One carbon pool by folate B9	MFS transporter, PCFT/HCP family, solute carrier family 46 (folate transporter), member 1
K02580	0	18	0	Folate biosynthesis and One carbon pool by folate B9	nuclear factor NF-kappa-B p105 subunit
K07209	0	18	0	Folate biosynthesis and One carbon pool by folate B9	inhibitor of nuclear factor kappa-B kinase subunit beta [EC:2.7.11.10]
K13950	15	0	2	Folate biosynthesis and One carbon pool by folate B9	para-aminobenzoate synthetase [EC:2.6.1.85]
K00501	0	17	0	Folate biosynthesis and One carbon pool by folate B9	tyrosine 3-monooxygenase [EC:1.14.16.2]
K03638	14	0	0	Folate biosynthesis and One carbon pool by folate B9	molybdopterin adenylyltransferase [EC:2.7.7.75]
K03831	13	0	0	Folate biosynthesis and One carbon pool by folate B9	molybdopterin adenylyltransferase [EC:2.7.7.75]
K18974	13	0	0	Folate biosynthesis and One carbon pool by folate B9	dihydropteroate synthase type 1 [EC:2.5.1.15]
K03342	13	0	0	Folate biosynthesis and One carbon pool by folate B9	para-aminobenzoate synthetase / 4-amino-4-deoxychorismate lyase [EC:2.6.1.85 4.1.3.38]
K06879	13	0	0	Folate biosynthesis and One carbon pool by folate B9	7-cyano-7-deazaguanine reductase [EC:1.7.1.13]
K10026	13	0	0	Folate biosynthesis and One carbon pool by folate B9	7-carboxy-7-deazaguanine synthase [EC:4.3.99.3]
K01664	13	0	0	Folate biosynthesis and One carbon pool by folate B9	para-aminobenzoate synthetase component II [EC:2.6.1.85]
K03752	13	0	0	Folate biosynthesis and One carbon pool by folate B9	molybdenum cofactor guanylyltransferase [EC:2.7.7.77]
K07141	13	0	0	Folate biosynthesis and One carbon pool by folate B9	molybdenum cofactor cytidylyltransferase [EC:2.7.7.76]
K08289	12	0	0	Folate biosynthesis and One carbon pool by folate B9	phosphoribosylglycinamide formyltransferase 2 [EC:2.1.2.2]
K06920	12	0	0	Folate biosynthesis and One carbon pool by folate B9	7-cyano-7-deazaguanine synthase [EC:6.3.4.20]
K01665	12	0	0	Folate biosynthesis and One carbon pool by folate B9	para-aminobenzoate synthetase component I [EC:2.6.1.85]
K06897	0	0	11	Folate biosynthesis and One carbon pool by folate B9	7,8-dihydropterin-6-yl-methyl-4-(beta-D-ribofuranosyl)aminobenzene 5'-phosphate synthase [EC:2.5.1.105]
K08310	11	0	0	Folate biosynthesis and One carbon pool by folate B9	dihydroneopterin triphosphate diphosphatase [EC:3.6.1.67]
K09457	10	0	0	Folate biosynthesis and One carbon pool by folate B9	7-cyano-7-deazaguanine reductase [EC:1.7.1.13]
K05668	0	8	0	Folate biosynthesis and One carbon pool by folate B9	ATP-binding cassette, subfamily C (CFTR/MRP), member 5
K00295	0	0	7	Folate biosynthesis and One carbon pool by folate B9	methylenetetrahydrofolate dehydrogenase (NAD+) [EC:1.5.1.15]
K18853	4	0	0	Folate biosynthesis and One carbon pool by folate B9	dihydromethanopterin reductase (acceptor) [EC:1.5.99.15]
K03465	0	0	0	Folate biosynthesis and One carbon pool by folate B9	thymidylate synthase (FAD) [EC:2.1.1.148]
K13998	0	0	0	Folate biosynthesis and One carbon pool by folate B9	dihydrofolate reductase / thymidylate synthase [EC:1.5.1.3 2.1.1.45]
K00601	0	0	0	Folate biosynthesis and One carbon pool by folate B9	phosphoribosylglycinamide formyltransferase [EC:2.1.2.2]
K13402	0	0	0	Folate biosynthesis and One carbon pool by folate B9	monofunctional C1-tetrahydrofolate synthase, mitochondrial [EC:6.3.4.3]
K21142	0	0	0	Folate biosynthesis and One carbon pool by folate B9	MoaE-MoaD fusion protein [EC:2.8.1.12]
K06984	0	0	0	Folate biosynthesis and One carbon pool by folate B9	beta-ribofuranosylaminobenzene 5'-phosphate synthase [EC:2.4.2.54]
K13939	0	0	0	Folate biosynthesis and One carbon pool by folate B9	dihydroneopterin aldolase / 2-amino-4-hydroxy-6-hydroxymethyldihydropteridine diphosphokinase / dihydropteroate synthase [EC:4.1.2.25 2.7.6.3 2.5.1.15]
K13941	0	0	0	Folate biosynthesis and One carbon pool by folate B9	2-amino-4-hydroxy-6-hydroxymethyldihydropteridine diphosphokinase / dihydropteroate synthase [EC:2.7.6.3 2.5.1.15]
K15740	0	0	0	Folate biosynthesis and One carbon pool by folate B9	tetrahydromethanopterin:alpha-L-glutamate ligase [EC:6.3.2.33]
K18482	0	0	0	Folate biosynthesis and One carbon pool by folate B9	4-amino-4-deoxychorismate lyase [EC:4.1.3.38]
K20457	0	0	0	Folate biosynthesis and One carbon pool by folate B9	dihydrofolate synthase [EC:6.3.2.12]
K04119	0	0	0	Folate biosynthesis and One carbon pool by folate B9	aldo-keto reductase family 1 member C3 [EC:1.1.1.51 1.1.1.188 1.1.1.213 1.1.1.357]
K13990	0	0	0	Folate biosynthesis and One carbon pool by folate B9	glutamate formiminotransferase / formiminotetrahydrofolate cyclodeaminase [EC:2.1.2.5 4.3.1.4]
K00603	0	0	0	Folate biosynthesis and One carbon pool by folate B9	glutamate formiminotransferase / 5-formyltetrahydrofolate cyclo-ligase [EC:2.1.2.5 6.3.3.2]
K13649	0	0	0	Folate biosynthesis and One carbon pool by folate B9	folate receptor
K00059	18	10	15	Biotin metabolism B7	3-oxoacyl-[acyl-carrier protein] reductase [EC:1.1.1.100]
K09458	15	18	0	Biotin metabolism B7	3-oxoacyl-[acyl-carrier-protein] synthase II [EC:2.3.1.179]
K01012	15	0	8	Biotin metabolism B7	biotin synthase [EC:2.8.1.6]
K01942	0	18	2	Biotin metabolism B7	biotin---protein ligase [EC:6.3.4.9 6.3.4.10 6.3.4.11 6.3.4.15]
K01435	0	18	0	Biotin metabolism B7	biotinidase [EC:3.5.1.12]
K01935	17	0	0	Biotin metabolism B7	dethiobiotin synthetase [EC:6.3.3.3]
K00647	15	0	0	Biotin metabolism B7	3-oxoacyl-[acyl-carrier-protein] synthase I [EC:2.3.1.41]
K00208	15	0	0	Biotin metabolism B7	enoyl-[acyl-carrier protein] reductase I [EC:1.3.1.9 1.3.1.10]
K00652	15	0	0	Biotin metabolism B7	8-amino-7-oxononanoate synthase [EC:2.3.1.47]
K00833	12	0	3	Biotin metabolism B7	adenosylmethionine---8-amino-7-oxononanoate aminotransferase [EC:2.6.1.62]
K02169	14	0	0	Biotin metabolism B7	malonyl-CoA O-methyltransferase [EC:2.1.1.197]
K08351	14	0	0	Biotin metabolism B7	biotin/methionine sulfoxide reductase [EC:1.-.-.-]
K02372	13	0	0	Biotin metabolism B7	3-hydroxyacyl-[acyl-carrier-protein] dehydratase [EC:4.2.1.59]
K03524	12	0	0	Biotin metabolism B7	BirA family transcriptional regulator, biotin operon repressor / biotin---[acetyl-CoA-carboxylase] ligase [EC:6.3.4.15]
K02170	10	0	0	Biotin metabolism B7	pimeloyl-[acyl-carrier protein] methyl ester esterase [EC:3.1.1.85]
K01906	6	0	0	Biotin metabolism B7	6-carboxyhexanoate--CoA ligase [EC:6.2.1.14]
K19562	0	0	2	Biotin metabolism B7	bifunctional dethiobiotin synthetase / adenosylmethionine---8-amino-7-oxononanoate aminotransferase [EC:6.3.3.3 2.6.1.62]
K16593	0	0	0	Biotin metabolism B7	pimeloyl-[acyl-carrier protein] synthase [EC:1.14.14.46]
K00763	17	18	11	Nicotinate and nicotinamide metabolism - B3 vitamin	nicotinate phosphoribosyltransferase [EC:6.3.4.21]
K00858	17	18	9	Nicotinate and nicotinamide metabolism - B3 vitamin	NAD+ kinase [EC:2.7.1.23]
K01081	12	18	11	Nicotinate and nicotinamide metabolism - B3 vitamin	5'-nucleotidase [EC:3.1.3.5]
K01950	16	18	7	Nicotinate and nicotinamide metabolism - B3 vitamin	NAD+ synthase (glutamine-hydrolysing) [EC:6.3.5.1]
K00323	16	18	0	Nicotinate and nicotinamide metabolism - B3 vitamin	H+-translocating NAD(P) transhydrogenase [EC:1.6.1.2 7.1.1.1]
K03783	13	18	0	Nicotinate and nicotinamide metabolism - B3 vitamin	purine-nucleoside phosphorylase [EC:2.4.2.1]
K11751	16	14	0	Nicotinate and nicotinamide metabolism - B3 vitamin	5'-nucleotidase / UDP-sugar diphosphatase [EC:3.1.3.5 3.6.1.45]
K06210	0	18	9	Nicotinate and nicotinamide metabolism - B3 vitamin	nicotinamide mononucleotide adenylyltransferase [EC:2.7.7.1 2.7.7.18]
K00135	18	0	4	Nicotinate and nicotinamide metabolism - B3 vitamin	succinate-semialdehyde dehydrogenase / glutarate-semialdehyde dehydrogenase [EC:1.2.1.16 1.2.1.79 1.2.1.20]
K20170	0	3	18	Nicotinate and nicotinamide metabolism - B3 vitamin	nicotine oxidoreductase [EC:1.5.3.-]
K01239	14	0	5	Nicotinate and nicotinamide metabolism - B3 vitamin	purine nucleosidase [EC:3.2.2.1]
K00767	15	0	3	Nicotinate and nicotinamide metabolism - B3 vitamin	nicotinate-nucleotide pyrophosphorylase (carboxylating) [EC:2.4.2.19]
K19970	0	18	0	Nicotinate and nicotinamide metabolism - B3 vitamin	5'-nucleotidase [EC:3.1.3.5]
K10524	0	18	0	Nicotinate and nicotinamide metabolism - B3 vitamin	nicotinamide/nicotinate riboside kinase [EC:2.7.1.22 2.7.1.173]
K00324	17	0	0	Nicotinate and nicotinamide metabolism - B3 vitamin	H+-translocating NAD(P) transhydrogenase subunit alpha [EC:1.6.1.2 7.1.1.1]
K00325	17	0	0	Nicotinate and nicotinamide metabolism - B3 vitamin	H+-translocating NAD(P) transhydrogenase subunit beta [EC:1.6.1.2 7.1.1.1]
K18030	16	0	0	Nicotinate and nicotinamide metabolism - B3 vitamin	nicotinate dehydrogenase subunit B [EC:1.17.2.1]
K19191	16	0	0	Nicotinate and nicotinamide metabolism - B3 vitamin	4-methylaminobutanoate oxidase (formaldehyde-forming) [EC:1.5.3.19]
K03784	14	0	0	Nicotinate and nicotinamide metabolism - B3 vitamin	purine-nucleoside phosphorylase [EC:2.4.2.1]
K11121	0	0	14	Nicotinate and nicotinamide metabolism - B3 vitamin	NAD-dependent histone deacetylase SIR2 [EC:3.5.1.-]
K03517	14	0	0	Nicotinate and nicotinamide metabolism - B3 vitamin	quinolinate synthase [EC:2.5.1.72]
K08281	14	0	0	Nicotinate and nicotinamide metabolism - B3 vitamin	nicotinamidase/pyrazinamidase [EC:3.5.1.19 3.5.1.-]
K00278	14	0	0	Nicotinate and nicotinamide metabolism - B3 vitamin	L-aspartate oxidase [EC:1.4.3.16]
K06211	13	0	0	Nicotinate and nicotinamide metabolism - B3 vitamin	HTH-type transcriptional regulator, transcriptional repressor of NAD biosynthesis genes [EC:2.7.7.1 2.7.1.22]
K01916	13	0	0	Nicotinate and nicotinamide metabolism - B3 vitamin	NAD+ synthase [EC:6.3.1.5]
K06989	13	0	0	Nicotinate and nicotinamide metabolism - B3 vitamin	aspartate dehydrogenase [EC:1.4.1.21]
K08324	13	0	0	Nicotinate and nicotinamide metabolism - B3 vitamin	succinate-semialdehyde dehydrogenase [EC:1.2.1.16 1.2.1.24]
K03787	12	0	0	Nicotinate and nicotinamide metabolism - B3 vitamin	5'-nucleotidase [EC:3.1.3.5]
K03426	12	0	0	Nicotinate and nicotinamide metabolism - B3 vitamin	NAD+ diphosphatase [EC:3.6.1.22]
K00322	12	0	0	Nicotinate and nicotinamide metabolism - B3 vitamin	NAD(P) transhydrogenase [EC:1.6.1.1]
K03743	12	0	0	Nicotinate and nicotinamide metabolism - B3 vitamin	nicotinamide-nucleotide amidase [EC:3.5.1.42]
K13995	12	0	0	Nicotinate and nicotinamide metabolism - B3 vitamin	maleamate amidohydrolase [EC:3.5.1.107]
K20454	12	0	0	Nicotinate and nicotinamide metabolism - B3 vitamin	2,3-dimethylmalate lyase [EC:4.1.3.32]
K18029	11	0	0	Nicotinate and nicotinamide metabolism - B3 vitamin	nicotinate dehydrogenase subunit A [EC:1.17.2.1]
K13522	10	0	0	Nicotinate and nicotinamide metabolism - B3 vitamin	bifunctional NMN adenylyltransferase/nudix hydrolase [EC:2.7.7.1 3.6.1.-]
K00969	10	0	0	Nicotinate and nicotinamide metabolism - B3 vitamin	nicotinate-nucleotide adenylyltransferase [EC:2.7.7.18]
K04765	10	0	0	Nicotinate and nicotinamide metabolism - B3 vitamin	nucleoside triphosphate diphosphatase [EC:3.6.1.9]
K03742	10	0	0	Nicotinate and nicotinamide metabolism - B3 vitamin	nicotinamide-nucleotide amidase [EC:3.5.1.42]
K15357	10	0	0	Nicotinate and nicotinamide metabolism - B3 vitamin	N-formylmaleamate deformylase [EC:3.5.1.106]
K04765	10	0	0	Nicotinate and nicotinamide metabolism - B3 vitamin	nucleoside triphosphate diphosphatase [EC:3.6.1.9]
K14974	9	0	0	Nicotinate and nicotinamide metabolism - B3 vitamin	6-hydroxynicotinate 3-monooxygenase [EC:1.14.13.114]
K18028	9	0	0	Nicotinate and nicotinamide metabolism - B3 vitamin	2,5-dihydroxypyridine 5,6-dioxygenase [EC:1.13.11.9]
K01799	9	0	0	Nicotinate and nicotinamide metabolism - B3 vitamin	maleate isomerase [EC:5.2.1.1]
K08723	8	0	0	Nicotinate and nicotinamide metabolism - B3 vitamin	5'-nucleotidase [EC:3.1.3.5]
K18550	0	0	3	Nicotinate and nicotinamide metabolism - B3 vitamin	IMP and pyridine-specific 5'-nucleotidase [EC:3.1.3.99 3.1.3.-]
K01240	0	0	2	Nicotinate and nicotinamide metabolism - B3 vitamin	uridine nucleosidase [EC:3.2.2.3]
K19189	2	0	0	Nicotinate and nicotinamide metabolism - B3 vitamin	2,6-dihydroxypyridine 3-monooxygenase [EC:1.14.13.10]
K08693	0	0	0	Nicotinate and nicotinamide metabolism - B3 vitamin	2',3'-cyclic-nucleotide 2'-phosphodiesterase / 3'-nucleotidase / 5'-nucleotidase [EC:3.1.4.16 3.1.3.6 3.1.3.5]
K20881	0	0	0	Nicotinate and nicotinamide metabolism - B3 vitamin	5'-nucleotidase [EC:3.1.3.5]
K03462	0	0	0	Nicotinate and nicotinamide metabolism - B3 vitamin	nicotinamide phosphoribosyltransferase [EC:2.4.2.12]
K01440	0	0	0	Nicotinate and nicotinamide metabolism - B3 vitamin	nicotinamidase [EC:3.5.1.19]
K00541	0	0	0	Nicotinate and nicotinamide metabolism - B3 vitamin	nicotinamide N-methyltransferase [EC:2.1.1.1]
K18551	0	0	0	Nicotinate and nicotinamide metabolism - B3 vitamin	pyrimidine and pyridine-specific 5'-nucleotidase [EC:3.1.3.-]
K19190	0	0	0	Nicotinate and nicotinamide metabolism - B3 vitamin	nicotine blue oxidoreductase [EC:1.1.1.328]
K19785	0	0	0	Nicotinate and nicotinamide metabolism - B3 vitamin	nicotinamide-nucleotide adenylyltransferase [EC:2.7.7.1]
K20448	0	0	0	Nicotinate and nicotinamide metabolism - B3 vitamin	nicotinate dehydrogenase medium molybdopterin subunit [EC:1.17.1.5]
K00600	17	18	14	One carbon pool by folate B9	glycine hydroxymethyltransferase [EC:2.1.2.1]
K00602	16	18	12	One carbon pool by folate B9	phosphoribosylaminoimidazolecarboxamide formyltransferase / IMP cyclohydrolase [EC:2.1.2.3 3.5.4.10]
K00297	15	18	12	One carbon pool by folate B9	methylenetetrahydrofolate reductase (NADPH) [EC:1.5.1.20]
K00560	18	18	6	One carbon pool by folate B9	thymidylate synthase [EC:2.1.1.45]
K00604	15	18	2	One carbon pool by folate B9	methionyl-tRNA formyltransferase [EC:2.1.2.9]
K00288	0	18	15	One carbon pool by folate B9	methylenetetrahydrofolate dehydrogenase (NADP+) / methenyltetrahydrofolate cyclohydrolase / formyltetrahydrofolate synthetase [EC:1.5.1.5 3.5.4.9 6.3.4.3]
K01934	12	17	4	One carbon pool by folate B9	5-formyltetrahydrofolate cyclo-ligase [EC:6.3.3.2]
K01491	14	13	0	One carbon pool by folate B9	methylenetetrahydrofolate dehydrogenase (NADP+) / methenyltetrahydrofolate cyclohydrolase [EC:1.5.1.5 3.5.4.9]
K01433	14	0	6	One carbon pool by folate B9	formyltetrahydrofolate deformylase [EC:3.5.1.10]
K00548	18	0	0	One carbon pool by folate B9	5-methyltetrahydrofolate--homocysteine methyltransferase [EC:2.1.1.13]
K11175	12	0	0	One carbon pool by folate B9	phosphoribosylglycinamide formyltransferase 1 [EC:2.1.2.2]
K00826	15	18	13	Pantothenate and CoA biosynthesis	branched-chain amino acid aminotransferase [EC:2.6.1.42]
K01652	17	0	16	Pantothenate and CoA biosynthesis	acetolactate synthase I/II/III large subunit [EC:2.2.1.6]
K00053	17	0	15	Pantothenate and CoA biosynthesis	ketol-acid reductoisomerase [EC:1.1.1.86]
K01687	18	0	14	Pantothenate and CoA biosynthesis	dihydroxy-acid dehydratase [EC:4.2.1.9]
K06133	14	18	0	Pantothenate and CoA biosynthesis	4'-phosphopantetheinyl transferase [EC:2.7.8.-]
K01464	13	18	0	Pantothenate and CoA biosynthesis	dihydropyrimidinase [EC:3.5.2.2]
K01598	3	18	8	Pantothenate and CoA biosynthesis	phosphopantothenoylcysteine decarboxylase [EC:4.1.1.36]
K00077	15	0	13	Pantothenate and CoA biosynthesis	2-dehydropantoate 2-reductase [EC:1.1.1.169]
K00606	16	0	8	Pantothenate and CoA biosynthesis	3-methyl-2-oxobutanoate hydroxymethyltransferase [EC:2.1.2.11]
K01653	15	0	7	Pantothenate and CoA biosynthesis	acetolactate synthase I/III small subunit [EC:2.2.1.6]
K09680	0	18	0	Pantothenate and CoA biosynthesis	type II pantothenate kinase [EC:2.7.1.33]
K00207	0	18	0	Pantothenate and CoA biosynthesis	dihydropyrimidine dehydrogenase (NADP+) [EC:1.3.1.2]
K01431	0	18	0	Pantothenate and CoA biosynthesis	beta-ureidopropionase [EC:3.5.1.6]
K01922	0	18	0	Pantothenate and CoA biosynthesis	phosphopantothenate---cysteine ligase (ATP) [EC:6.3.2.51]
K02318	0	18	0	Pantothenate and CoA biosynthesis	phosphopantetheine adenylyltransferase / dephospho-CoA kinase [EC:2.7.7.3 2.7.1.24]
K08069	0	18	0	Pantothenate and CoA biosynthesis	pantetheine hydrolase [EC:3.5.1.92]
K13038	16	0	0	Pantothenate and CoA biosynthesis	phosphopantothenoylcysteine decarboxylase / phosphopantothenate---cysteine ligase [EC:4.1.1.36 6.3.2.5]
K01918	15	0	0	Pantothenate and CoA biosynthesis	pantoate--beta-alanine ligase [EC:6.3.2.1]
K00867	14	0	0	Pantothenate and CoA biosynthesis	type I pantothenate kinase [EC:2.7.1.33]
K00954	14	0	0	Pantothenate and CoA biosynthesis	pantetheine-phosphate adenylyltransferase [EC:2.7.7.3]
K00997	14	0	0	Pantothenate and CoA biosynthesis	holo-[acyl-carrier protein] synthase [EC:2.7.8.7]
K00859	13	0	0	Pantothenate and CoA biosynthesis	dephospho-CoA kinase [EC:2.7.1.24]
K17722	11	0	0	Pantothenate and CoA biosynthesis	dihydropyrimidine dehydrogenase (NAD+) subunit PreT [EC:1.3.1.1]
K17723	11	0	0	Pantothenate and CoA biosynthesis	dihydropyrimidine dehydrogenase (NAD+) subunit PreA [EC:1.3.1.1]
K01579	11	0	0	Pantothenate and CoA biosynthesis	aspartate 1-decarboxylase [EC:4.1.1.11]
K03525	10	0	0	Pantothenate and CoA biosynthesis	type III pantothenate kinase [EC:2.7.1.33]
K11258	8	0	0	Pantothenate and CoA biosynthesis	acetolactate synthase II small subunit [EC:2.2.1.6]
K02201	0	0	5	Pantothenate and CoA biosynthesis	pantetheine-phosphate adenylyltransferase [EC:2.7.7.3]
K08682	4	0	0	Pantothenate and CoA biosynthesis	acyl carrier protein phosphodiesterase [EC:3.1.4.14]
K18966	0	0	0	Pantothenate and CoA biosynthesis	sulfinoalanine decarboxylase / aspartate 1-decarboxylase [EC:4.1.1.29 4.1.1.11]
K21977	0	0	0	Pantothenate and CoA biosynthesis	phosphopantothenate---cysteine ligase (CTP) [EC:6.3.2.5]
K18933	0	0	0	Pantothenate and CoA biosynthesis	tyrosine decarboxylase / aspartate 1-decarboxylase [EC:4.1.1.25 4.1.1.11]
K01885	16	18	12	Porphyrin metabolism B12	glutamyl-tRNA synthetase [EC:6.1.1.17]
K01698	16	18	8	Porphyrin metabolism B12	porphobilinogen synthase [EC:4.2.1.24]
K01749	16	18	7	Porphyrin metabolism B12	hydroxymethylbilane synthase [EC:2.5.1.61]
K00228	14	18	8	Porphyrin metabolism B12	coproporphyrinogen III oxidase [EC:1.3.3.3]
K00643	10	18	10	Porphyrin metabolism B12	5-aminolevulinate synthase [EC:2.3.1.37]
K02259	15	18	4	Porphyrin metabolism B12	cytochrome c oxidase assembly protein subunit 15
K01599	13	18	3	Porphyrin metabolism B12	uroporphyrinogen decarboxylase [EC:4.1.1.37]
K02257	16	18	0	Porphyrin metabolism B12	heme o synthase [EC:2.5.1.141]
K01772	15	18	0	Porphyrin metabolism B12	protoporphyrin/coproporphyrin ferrochelatase [EC:4.99.1.1 4.99.1.9]
K09882	15	18	0	Porphyrin metabolism B12	cobaltochelatase CobS [EC:6.6.1.2]
K01719	13	18	0	Porphyrin metabolism B12	uroporphyrinogen-III synthase [EC:4.2.1.75]
K00798	12	18	0	Porphyrin metabolism B12	cob(I)alamin adenosyltransferase [EC:2.5.1.17]
K00231	9	18	1	Porphyrin metabolism B12	protoporphyrinogen/coproporphyrinogen III oxidase [EC:1.3.3.4 1.3.3.15]
K01764	0	18	10	Porphyrin metabolism B12	cytochrome c heme-lyase [EC:4.4.1.17]
K01195	10	18	0	Porphyrin metabolism B12	beta-glucuronidase [EC:3.2.1.31]
K14163	0	18	0	Porphyrin metabolism B12	bifunctional glutamyl/prolyl-tRNA synthetase [EC:6.1.1.17 6.1.1.15]
K01845	16	0	2	Porphyrin metabolism B12	glutamate-1-semialdehyde 2,1-aminomutase [EC:5.4.3.8]
K19054	0	18	0	Porphyrin metabolism B12	frataxin [EC:1.16.3.1]
K02234	15	0	3	Porphyrin metabolism B12	cobalamin biosynthesis protein CobW
K00699	0	18	0	Porphyrin metabolism B12	glucuronosyltransferase [EC:2.4.1.17]
K02230	17	0	0	Porphyrin metabolism B12	cobaltochelatase CobN [EC:6.6.1.2]
K03594	17	0	0	Porphyrin metabolism B12	bacterioferritin [EC:1.16.3.1]
K02495	16	0	0	Porphyrin metabolism B12	oxygen-independent coproporphyrinogen III oxidase [EC:1.3.98.3]
K09883	16	0	0	Porphyrin metabolism B12	cobaltochelatase CobT [EC:6.6.1.2]
K00768	15	0	0	Porphyrin metabolism B12	nicotinate-nucleotide--dimethylbenzimidazole phosphoribosyltransferase [EC:2.4.2.21]
K02229	15	0	0	Porphyrin metabolism B12	precorrin-3B synthase [EC:1.14.13.83]
K02232	15	0	0	Porphyrin metabolism B12	adenosylcobyric acid synthase [EC:6.3.5.10]
K02303	15	0	0	Porphyrin metabolism B12	uroporphyrin-III C-methyltransferase [EC:2.1.1.107]
K13541	15	0	0	Porphyrin metabolism B12	cobalt-precorrin 5A hydrolase / precorrin-3B C17-methyltransferase [EC:3.7.1.12 2.1.1.131]
K02224	14	0	0	Porphyrin metabolism B12	cobyrinic acid a,c-diamide synthase [EC:6.3.5.9 6.3.5.11]
K02302	14	0	0	Porphyrin metabolism B12	uroporphyrin-III C-methyltransferase / precorrin-2 dehydrogenase / sirohydrochlorin ferrochelatase [EC:2.1.1.107 1.3.1.76 4.99.1.4]
K02492	14	0	0	Porphyrin metabolism B12	glutamyl-tRNA reductase [EC:1.2.1.70]
K03394	14	0	0	Porphyrin metabolism B12	precorrin-2/cobalt-factor-2 C20-methyltransferase [EC:2.1.1.130 2.1.1.151]
K02225	13	0	0	Porphyrin metabolism B12	cobalamin biosynthetic protein CobC
K02496	13	0	0	Porphyrin metabolism B12	uroporphyrin-III C-methyltransferase [EC:2.1.1.107]
K19221	13	0	0	Porphyrin metabolism B12	cob(I)alamin adenosyltransferase [EC:2.5.1.17]
K22316	12	0	0	Porphyrin metabolism B12	ribonuclease H / adenosylcobalamin/alpha-ribazole phosphatase [EC:3.1.26.4 3.1.3.73]
K02227	12	0	0	Porphyrin metabolism B12	adenosylcobinamide-phosphate synthase [EC:6.3.1.10]
K02231	12	0	0	Porphyrin metabolism B12	adenosylcobinamide kinase / adenosylcobinamide-phosphate guanylyltransferase [EC:2.7.1.156 2.7.7.62]
K02233	12	0	0	Porphyrin metabolism B12	adenosylcobinamide-GDP ribazoletransferase [EC:2.7.8.26]
K05895	12	0	0	Porphyrin metabolism B12	precorrin-6A/cobalt-precorrin-6A reductase [EC:1.3.1.54 1.3.1.106]
K06042	12	0	0	Porphyrin metabolism B12	precorrin-8X/cobalt-precorrin-8 methylmutase [EC:5.4.99.61 5.4.99.60]
K00595	11	0	0	Porphyrin metabolism B12	precorrin-6Y C5,15-methyltransferase (decarboxylating) [EC:2.1.1.132]
K03404	11	0	0	Porphyrin metabolism B12	magnesium chelatase subunit D [EC:6.6.1.1]
K02188	10	0	0	Porphyrin metabolism B12	cobalt-precorrin-5B (C1)-methyltransferase [EC:2.1.1.195]
K02189	10	0	0	Porphyrin metabolism B12	cobalt-precorrin 5A hydrolase [EC:3.7.1.12]
K02226	10	0	0	Porphyrin metabolism B12	alpha-ribazole phosphatase [EC:3.1.3.73]
K02228	10	0	0	Porphyrin metabolism B12	precorrin-6A synthase [EC:2.1.1.152]
K03405	10	0	0	Porphyrin metabolism B12	magnesium chelatase subunit I [EC:6.6.1.1]
K04034	10	0	0	Porphyrin metabolism B12	anaerobic magnesium-protoporphyrin IX monomethyl ester cyclase [EC:1.21.98.3]
K05936	10	0	0	Porphyrin metabolism B12	precorrin-4/cobalt-precorrin-4 C11-methyltransferase [EC:2.1.1.133 2.1.1.271]
K22227	10	0	0	Porphyrin metabolism B12	heme synthase
K03795	9	0	0	Porphyrin metabolism B12	sirohydrochlorin cobaltochelatase [EC:4.99.1.3]
K05934	9	0	0	Porphyrin metabolism B12	precorrin-3B C17-methyltransferase [EC:2.1.1.131]
K00230	8	0	0	Porphyrin metabolism B12	menaquinone-dependent protoporphyrinogen oxidase [EC:1.3.5.3]
K13542	8	0	0	Porphyrin metabolism B12	uroporphyrinogen III methyltransferase / synthase [EC:2.1.1.107 4.2.1.75]
K00589	0	0	5	Porphyrin metabolism B12	uroporphyrin-III C-methyltransferase [EC:2.1.1.107]
K02304	0	0	5	Porphyrin metabolism B12	precorrin-2 dehydrogenase / sirohydrochlorin ferrochelatase [EC:1.3.1.76 4.99.1.4]
K13786	5	0	0	Porphyrin metabolism B12	cob(II)yrinic acid a,c-diamide reductase [EC:1.16.8.1]
K07215	3	0	0	Porphyrin metabolism B12	heme oxygenase (biliverdin-IX-beta and delta-forming) [EC:1.14.99.58]
K08100	2	0	0	Porphyrin metabolism B12	bilirubin oxidase [EC:1.3.3.5]
K13540	2	0	0	Porphyrin metabolism B12	precorrin-2 C20-methyltransferase / precorrin-3B C17-methyltransferase [EC:2.1.1.130 2.1.1.131]
K22336	2	0	0	Porphyrin metabolism B12	bacterioferritin B [EC:1.16.3.1]
K21418	0	0	0	Porphyrin metabolism B12	heme oxygenase 2 [EC:1.14.14.18]
K10960	0	0	0	Porphyrin metabolism B12	geranylgeranyl diphosphate/geranylgeranyl-bacteriochlorophyllide a reductase [EC:1.3.1.83 1.3.1.111]
K04040	0	0	0	Porphyrin metabolism B12	chlorophyll/bacteriochlorophyll a synthase [EC:2.5.1.62 2.5.1.133]
K00218	0	0	0	Porphyrin metabolism B12	protochlorophyllide reductase [EC:1.3.1.33]
K00435	0	0	0	Porphyrin metabolism B12	Fe-coproporphyrin III decarboxylase [EC:1.11.1.-]
K03403	0	0	0	Porphyrin metabolism B12	magnesium chelatase subunit H [EC:6.6.1.1]
K03428	0	0	0	Porphyrin metabolism B12	magnesium-protoporphyrin O-methyltransferase [EC:2.1.1.11]
K03794	0	0	0	Porphyrin metabolism B12	sirohydrochlorin ferrochelatase [EC:4.99.1.4]
K04035	0	0	0	Porphyrin metabolism B12	magnesium-protoporphyrin IX monomethyl ester (oxidative) cyclase [EC:1.14.13.81]
K04037	0	0	0	Porphyrin metabolism B12	light-independent protochlorophyllide reductase subunit L [EC:1.3.7.7]
K04038	0	0	0	Porphyrin metabolism B12	light-independent protochlorophyllide reductase subunit N [EC:1.3.7.7]
K04039	0	0	0	Porphyrin metabolism B12	light-independent protochlorophyllide reductase subunit B [EC:1.3.7.7]
K04720	0	0	0	Porphyrin metabolism B12	threonine-phosphate decarboxylase [EC:4.1.1.81]
K07145	0	0	0	Porphyrin metabolism B12	heme oxygenase (staphylobilin-producing) [EC:1.14.99.48]
K08099	0	0	0	Porphyrin metabolism B12	chlorophyllase [EC:3.1.1.14]
K11334	0	0	0	Porphyrin metabolism B12	3,8-divinyl chlorophyllide a/chlorophyllide a reductase subunit Y [EC:1.3.7.14 1.3.7.15]
K11336	0	0	0	Porphyrin metabolism B12	3-vinyl bacteriochlorophyllide hydratase [EC:4.2.1.165]
K13071	0	0	0	Porphyrin metabolism B12	pheophorbide a oxygenase [EC:1.14.15.17]
K13543	0	0	0	Porphyrin metabolism B12	uroporphyrinogen III methyltransferase / synthase [EC:2.1.1.107 4.2.1.75]
K13544	0	0	0	Porphyrin metabolism B12	pheophorbidase [EC:3.1.1.82]
K13600	0	0	0	Porphyrin metabolism B12	chlorophyllide a oxygenase [EC:1.14.13.122]
K13606	0	0	0	Porphyrin metabolism B12	chlorophyll(ide) b reductase [EC:1.1.1.294]
K18010	0	0	0	Porphyrin metabolism B12	7-hydroxymethyl chlorophyll a reductase [EC:1.17.7.2]
K19073	0	0	0	Porphyrin metabolism B12	divinyl chlorophyllide a 8-vinyl-reductase [EC:1.3.1.75]
K21480	0	0	0	Porphyrin metabolism B12	heme oxygenase (biliverdin-producing, ferredoxin) [EC:1.14.15.20]
K21682	0	0	0	Porphyrin metabolism B12	pyruvate dehydrogenase (NADP+) / aquacobalamin reductase (NADPH) [EC:1.2.1.51 1.16.1.5]
K22013	0	0	0	Porphyrin metabolism B12	magnesium dechelatase [EC:4.99.1.10]
K22225	0	0	0	Porphyrin metabolism B12	siroheme decarboxylase [EC:4.1.1.111]
K22226	0	0	0	Porphyrin metabolism B12	Fe-coproporphyrin III synthase
K00953	6	18	2	Riboflavin metabolism	FAD synthetase [EC:2.7.7.2]
K01497	12	0	8	Riboflavin metabolism	GTP cyclohydrolase II [EC:3.5.4.25]
K14655	0	18	2	Riboflavin metabolism	tRNA pseudouridine32 synthase / 2,5-diamino-6-(5-phospho-D-ribitylamino)-pyrimidin-4(3H)-one deaminase [EC:5.4.99.28]
K00794	14	0	6	Riboflavin metabolism	6,7-dimethyl-8-ribityllumazine synthase [EC:2.5.1.78]
K01497	12	0	8	Riboflavin metabolism	GTP cyclohydrolase II [EC:3.5.4.25]
K00793	14	0	5	Riboflavin metabolism	riboflavin synthase [EC:2.5.1.9]
K05901	0	18	0	Riboflavin metabolism	biliverdin reductase / flavin reductase [EC:1.3.1.24 1.5.1.30]
K14410	0	18	0	Riboflavin metabolism	lysosomal acid phosphatase [EC:3.1.3.2]
K00861	0	18	0	Riboflavin metabolism	riboflavin kinase [EC:2.7.1.26]
K04719	18	0	0	Riboflavin metabolism	5,6-dimethylbenzimidazole synthase [EC:1.13.11.79]
K05901	0	18	0	Riboflavin metabolism	biliverdin reductase / flavin reductase [EC:1.3.1.24 1.5.1.30]
K11753	16	0	0	Riboflavin metabolism	riboflavin kinase / FMN adenylyltransferase [EC:2.7.1.26 2.7.7.2]
K05368	15	0	0	Riboflavin metabolism	aquacobalamin reductase / NAD(P)H-flavin reductase [EC:1.16.1.3 1.5.1.41]
K09474	15	0	0	Riboflavin metabolism	acid phosphatase (class A) [EC:3.1.3.2]
K11752	15	0	0	Riboflavin metabolism	diaminohydroxyphosphoribosylaminopyrimidine deaminase / 5-amino-6-(5-phosphoribosylamino)uracil reductase [EC:3.5.4.26 1.1.1.193]
K05368	15	0	0	Riboflavin metabolism	aquacobalamin reductase / NAD(P)H-flavin reductase [EC:1.16.1.3 1.5.1.41]
K14652	14	0	0	Riboflavin metabolism	3,4-dihydroxy 2-butanone 4-phosphate synthase / GTP cyclohydrolase II [EC:4.1.99.12 3.5.4.25]
K02858	12	0	2	Riboflavin metabolism	3,4-dihydroxy 2-butanone 4-phosphate synthase [EC:4.1.99.12]
K00299	14	0	0	Riboflavin metabolism	FMN reductase [EC:1.5.1.38]
K14652	14	0	0	Riboflavin metabolism	3,4-dihydroxy 2-butanone 4-phosphate synthase / GTP cyclohydrolase II [EC:4.1.99.12 3.5.4.25]
K21064	13	0	0	Riboflavin metabolism	5-amino-6-(5-phospho-D-ribitylamino)uracil phosphatase [EC:3.1.3.104]
K14654	0	0	11	Riboflavin metabolism	2,5-diamino-6-(ribosylamino)-4(3H)-pyrimidinone 5'-phosphate reductase [EC:1.1.1.302]
K18453	10	0	0	Riboflavin metabolism	ADP-ribose/FAD diphosphatase [EC:3.6.1.13 3.6.1.18]
K20862	10	0	0	Riboflavin metabolism	FMN hydrolase / 5-amino-6-(5-phospho-D-ribitylamino)uracil phosphatase [EC:3.1.3.102 3.1.3.104]
K01093	7	0	0	Riboflavin metabolism	4-phytase / acid phosphatase [EC:3.1.3.26 3.1.3.2]
K01513	1	0	5	Riboflavin metabolism	ectonucleotide pyrophosphatase/phosphodiesterase family member 1/3 [EC:3.1.4.1 3.6.1.9]
K01513	1	0	5	Riboflavin metabolism	ectonucleotide pyrophosphatase/phosphodiesterase family member 1/3 [EC:3.1.4.1 3.6.1.9]
K01513	1	0	5	Riboflavin metabolism	ectonucleotide pyrophosphatase/phosphodiesterase family member 1/3 [EC:3.1.4.1 3.6.1.9]
K20884	5	0	0	Riboflavin metabolism	riboflavin kinase / FMN hydrolase [EC:2.7.1.26 3.1.3.102]
K20861	2	0	0	Riboflavin metabolism	FMN hydrolase / 5-amino-6-(5-phospho-D-ribitylamino)uracil phosphatase [EC:3.1.3.102 3.1.3.104]
K14379	0	0	0	Riboflavin metabolism	tartrate-resistant acid phosphatase type 5 [EC:3.1.3.2]
K19285	0	0	0	Riboflavin metabolism	FMN reductase (NADPH) [EC:1.5.1.38]
K19286	0	0	0	Riboflavin metabolism	FMN reductase [NAD(P)H] [EC:1.5.1.39]
K20860	0	0	0	Riboflavin metabolism	FMN hydrolase / 5-amino-6-(5-phospho-D-ribitylamino)uracil phosphatase [EC:3.1.3.102 3.1.3.104]
K00484	0	0	0	Riboflavin metabolism	flavin reductase (NADH) [EC:1.5.1.36]
K01077	16	18	11	Thiamine metabolism	alkaline phosphatase [EC:3.1.3.1]
K01077	16	18	11	Thiamine metabolism	alkaline phosphatase [EC:3.1.3.1]
K04487	15	18	11	Thiamine metabolism	cysteine desulfurase [EC:2.8.1.7]
K00939	15	18	10	Thiamine metabolism	adenylate kinase [EC:2.7.4.3]
K00949	9	18	2	Thiamine metabolism	thiamine pyrophosphokinase [EC:2.7.6.2]
K14394	0	18	0	Thiamine metabolism	low molecular weight phosphotyrosine protein phosphatase [EC:3.1.3.2 3.1.3.48]
K14394	0	18	0	Thiamine metabolism	low molecular weight phosphotyrosine protein phosphatase [EC:3.1.3.2 3.1.3.48]
K06928	0	17	0	Thiamine metabolism	nucleoside-triphosphatase [EC:3.6.1.15]
K00946	17	0	0	Thiamine metabolism	thiamine-monophosphate kinase [EC:2.7.4.16]
K01662	16	0	0	Thiamine metabolism	1-deoxy-D-xylulose-5-phosphate synthase [EC:2.2.1.7]
K03147	16	0	0	Thiamine metabolism	phosphomethylpyrimidine synthase [EC:4.1.99.17]
K00941	15	0	0	Thiamine metabolism	hydroxymethylpyrimidine/phosphomethylpyrimidine kinase [EC:2.7.1.49 2.7.4.7]
K03149	15	0	0	Thiamine metabolism	thiazole synthase [EC:2.8.1.10]
K00788	14	0	0	Thiamine metabolism	thiamine-phosphate pyrophosphorylase [EC:2.5.1.3]
K01078	0	0	14	Thiamine metabolism	acid phosphatase [EC:3.1.3.2]
K01078	0	0	14	Thiamine metabolism	acid phosphatase [EC:3.1.3.2]
K06949	13	0	0	Thiamine metabolism	ribosome biogenesis GTPase / thiamine phosphate phosphatase [EC:3.6.1.- 3.1.3.100]
K03707	13	0	0	Thiamine metabolism	thiaminase (transcriptional activator TenA) [EC:3.5.99.2]
K03153	12	0	0	Thiamine metabolism	glycine oxidase [EC:1.4.3.19]
K03151	11	0	0	Thiamine metabolism	tRNA uracil 4-sulfurtransferase [EC:2.8.1.4]
K00878	10	0	0	Thiamine metabolism	hydroxyethylthiazole kinase [EC:2.7.1.50]
K07251	10	0	0	Thiamine metabolism	thiamine kinase [EC:2.7.1.89]
K03148	9	0	0	Thiamine metabolism	sulfur carrier protein ThiS adenylyltransferase [EC:2.7.7.73]
K03146	0	0	5	Thiamine metabolism	cysteine-dependent adenosine diphosphate thiazole synthase [EC:2.4.2.60]
K00877	0	0	2	Thiamine metabolism	hydroxymethylpyrimidine/phosphomethylpyrimidine kinase / thiaminase [EC:2.7.1.49 2.7.4.7 3.5.99.2]
K03150	2	0	0	Thiamine metabolism	2-iminoacetate synthase [EC:4.1.99.19]
K20895	2	0	0	Thiamine metabolism	formylaminopyrimidine deformylase [EC:3.5.1.-]
K05307	0	0	0	Thiamine metabolism	thiamine-triphosphatase [EC:3.6.1.28]
K14153	0	0	0	Thiamine metabolism	hydroxymethylpyrimidine kinase / phosphomethylpyrimidine kinase / thiamine-phosphate diphosphorylase [EC:2.7.1.49 2.7.4.7 2.5.1.3]
K14154	0	0	0	Thiamine metabolism	thiamine-phosphate diphosphorylase / hydroxyethylthiazole kinase [EC:2.5.1.3 2.7.1.50]
K18278	0	0	0	Thiamine metabolism	pyrimidine precursor biosynthesis enzyme
K00275	16	18	10	Vitamin B6 metabolism	pyridoxamine 5'-phosphate oxidase [EC:1.4.3.5]
K00831	18	18	4	Vitamin B6 metabolism	phosphoserine aminotransferase [EC:2.6.1.52]
K01733	15	0	15	Vitamin B6 metabolism	threonine synthase [EC:4.2.3.1]
K00868	12	18	0	Vitamin B6 metabolism	pyridoxine kinase [EC:2.7.1.35]
K05275	17	0	4	Vitamin B6 metabolism	pyridoxine 4-dehydrogenase [EC:1.1.1.65]
K13248	0	18	0	Vitamin B6 metabolism	pyridoxal phosphate phosphatase PHOSPHO2 [EC:3.1.3.74]
K03472	16	0	0	Vitamin B6 metabolism	D-erythrose 4-phosphate dehydrogenase [EC:1.2.1.72]
K06215	11	0	5	Vitamin B6 metabolism	pyridoxal 5'-phosphate synthase pdxS subunit [EC:4.3.3.6]
K00097	15	0	0	Vitamin B6 metabolism	4-hydroxythreonine-4-phosphate dehydrogenase [EC:1.1.1.262]
K03474	14	0	0	Vitamin B6 metabolism	pyridoxine 5-phosphate synthase [EC:2.6.99.2]
K03473	10	0	0	Vitamin B6 metabolism	erythronate-4-phosphate dehydrogenase [EC:1.1.1.290]
K18608	10	0	0	Vitamin B6 metabolism	pyridoxamine---pyruvate transaminase [EC:2.6.1.30]
K08681	5	0	3	Vitamin B6 metabolism	5'-phosphate synthase pdxT subunit [EC:4.3.3.6]
